# Supplementary material for: Highly efficient diglycolamide-functionalized dendrimers for the sequestration of tetravalent actinides: solvent extraction and theoretical studies
Source: Royal Society of Chemistry journal article supplement (doi:10.1039/d1nj00724f), 2021-01-01
Supplement: d1nj00724f1.pdf [file d1nj00724f1.pdf]

## **Highly efficient diglycolamide-functionalized dendrimers for the sequestration of tetravalent actinides: Solvent extraction and theoretical studies**

Parveen K. Verma,<sup>a</sup> Rajesh B. Gujar, Prasanta K. Mohapatra,<sup>a,\*</sup> Sk. MusharafAli,<sup>b</sup> Andrea Leoncini,<sup>c</sup> Jurriaan Huskens<sup>c</sup> and Willem Verboom<sup>c,\*</sup>

### **Electronic Supporting Information**

## S1. Oxidation state adjustment

The oxidation state of Pu was adjusted to its +4 state by the following procedure. To a Pu solution in 1 M HNO<sub>3</sub>, a few drops of NaNO<sub>2</sub> solution was added followed by slow warming under an infrared lamp inside a well-ventilated fume hood. Subsequently, the aqueous phase was contacted with an equal volume of 0.5 M TTA (2-thenoyltrifluoroacetone)solution (in xylene) in a leak tight Pyrex glass tube. The phases were separated and the aqueous phase was carefully separated to result in the organic extract devoid of any aqueous phase. The organic extract was subsequently contacted with 8 M HNO<sub>3</sub> to back extract the Pu(IV). The aqueous phase was then rinsed with xylene twice to remove traces of dissolved TTA. The aqueous phase was then kept as the Pu(IV) stock which was found to be stable for over 2 months. The valency of Pu(IV) in this stock was checked by a TTA concentration variation experiment, which resulted in a slope value of ca. 4 in the fitted log *D* vs log [TTA] concentration plot. The oxidation state of Np was also checked intermittently in an identical manner and conformed to the +4 state.

## S2. Derivation of the extraction equilibrium constant

As mentioned in the main text, the two-phase extraction equilibrium constant (*K<sub>ex</sub>*) is given as

$$K_{ex} = \frac{[M(NO_3)_b]_{org} \cdot aL_{(org)}}{[M^{+4}]_{(aq)} [NO_3^-]_{(aq)}^b [L_{(f,org)}]^a} \dots 1$$

Since the extraction of the M(IV) is taken from nitric acid media, one has to take into account the nitrate complexation of M(IV) with the NO<sub>3</sub><sup>-</sup> ions in the aqueous feed. Various species of M(IV) such as M(NO<sub>3</sub>)<sub>3</sub><sup>3+</sup>, M(NO<sub>3</sub>)<sub>2</sub><sup>2+</sup>, M(NO<sub>3</sub>)<sub>3</sub><sup>+</sup>, M(NO<sub>3</sub>)<sub>4</sub> etc., can be present in the aqueous phase and the total concentration of M(IV) (*C<sub>M(IV)</sub>*) is given by equation (2).

$$C_{M(IV)} = [M^{+4}]_{(aq)} \left( 1 + \sum_i^n \beta_n [NO_3^-]^n \right) \dots 2$$

Where β<sub>*n*</sub> is the overall concentration stability constant for the complex M(NO<sub>3</sub>)<sub>*n*</sub><sup>(4-*n*)<sup>+</sup></sup> by equation (3):

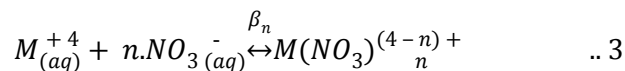

Equation (4) can be easily derived by combining equations (1) and (2):

$$K_{ex} = \frac{K_{Nit} [M(NO_3)_b]_{org} \cdot aL_{(org)}}{C_{M(IV)} [NO_3^-]_{(aq)}^b [L_{(f,org)}]^a} \dots 4$$

where

$$K_{Nit} = \left( 1 + \sum_i^n \beta_n [NO_3^-]^n \right) \quad .. 5$$

$D_{M(IV)}$ , the distribution ratio of the tetravalent actinides in the biphasic system, is given by equation (6). On combining equations(5) and (6) and taking the log on both sides gives equation (7):

$$D_{M(IV)} = \frac{[M(NO_3)_b \cdot aL_{(org)}]}{C_{M(IV)}} \dots 6$$

$$\log D_{M(IV)} = \log K'_{ex} + a \cdot \log [L_{(f,org)}] + b \cdot \log [NO_3^-]_{(aq)} \quad .. 7$$

Where  $K'_{ex} = \frac{K_{ex}}{K_{Nit}} \dots \dots \dots 8$

### S3. Solvent extraction studies

#### S3.1 Time of equilibration

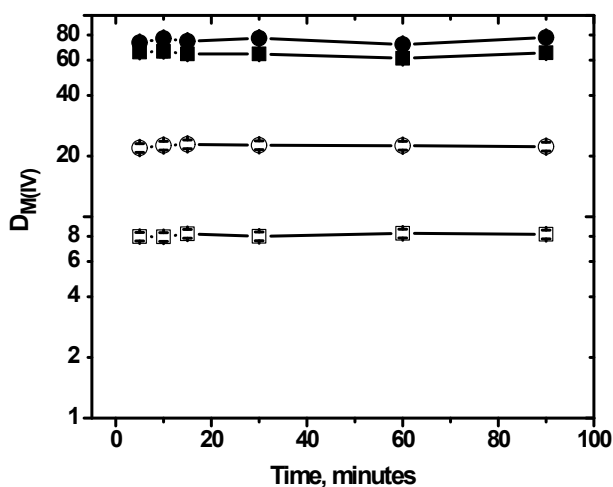

**Fig.S1** Extraction of Np(IV) (open symbols) and Pu(IV) (closed symbols) by 0.1 mM L<sub>I</sub> (square) and L<sub>II</sub> (circle) dissolved in 5% IDA+ *n*-dodecane as a function of varying time; [HNO<sub>3</sub>]: 3 M, T: 298 K.

#### S3.2 Extraction of water and acid

The extraction of water into the organic phase was done by Karl-Fisher titration method while that of nitric acid was done by normal acid base titration using phenolphthaliene indicator. The results are given in Table S1.

**Table S1: Water and acid water uptake by 0.1 mM ligands ( $L_I$  or  $L_{II}$ ) in 5% iso-decanol in  $n$ -dodecane equilibrated with 3M  $HNO_3$ . The titration results had about 2% errors.**

| Sample                                                           | Water content (%) | Acidity (M) |
|------------------------------------------------------------------|-------------------|-------------|
| 5% iso-decanol in $n$ -dodecane                                  | 0.050             | 0.029       |
| $1 \times 10^{-4}$ M $L_I$ in 5% iso-decanol in $n$ -dodecane    | 0.053             | 0.033       |
| $1 \times 10^{-4}$ M $L_{II}$ in 5% iso-decanol in $n$ -dodecane | 0.053             | 0.030       |

### S3.3 Determination of $K_H$ value

The acid uptake for the 0.1 mM L-I/II dissolved in 5% Isodecanol + 95 %  $n$ -dodecane was found to be comparable to the acid uptake by the 5% Isodecanol + 95 %  $n$ -dodecane without any ligand, hence the ligands concentration was increased by 10 times and the acid uptake is evaluated. Even at the ligand concentration (1mM L-I/II) the acid uptake by the system is comparable (within the error limits) acid uptake by the 5% Isodecanol + 95 %  $n$ -dodecane without any ligand (Fig. 1) suggesting the majority of the acid is taken by Isodecanol, which looks logical as the concentration of Isodecanol is >250 time of the ligands concentration under the present system.

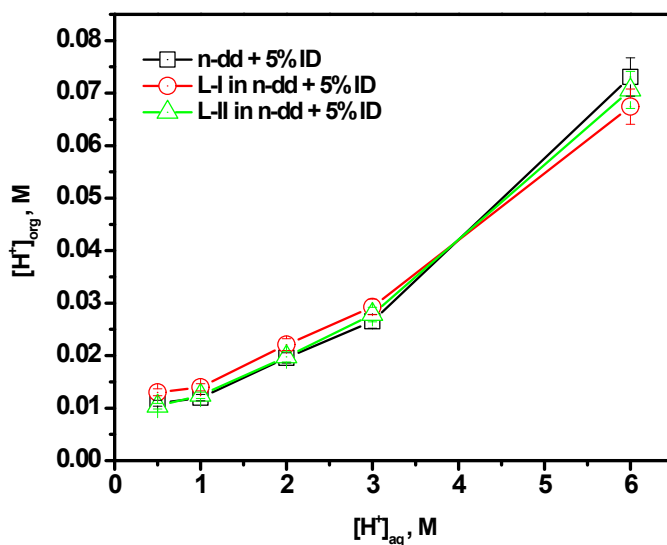

**Fig. S2.** Acid uptake by the L-I/L-II (1mM ) dissolved in 95 %  $n$ -dodecane + 5% isodecanol and its comparison with blank 95 %  $n$ -dodecane + 5% isodecanol at different acidities.

Although the ligand concentration can be further increased to overcome this issue but it has other limitation such as higher L-I/L-II concentration the system can behave entirely in different manner as compared the one used for the extraction studies, the higher ligand concentration can leads to some micelles/ aggregated formation which may be not true representation of the extraction system beside that the quantity of the synthesized ligands is also is a limiting factor. Considering theses limitation the spectroscopic techniques i.e. FTIR was chosen to get the information about the interaction of  $\text{HNO}_3$  with L-I/L-II dissolved in 5% Isodecanol + 95 % n-dodecane. Although the direct quantitative estimation using FTIR is difficult but can be done provided the sample composition does not vary as a function of time or temperature, the thickness of sample should not vary (e.g. due to evaporation of solvent etc) etc. as the present system satisfies the above requirements we have recorded the ATR-FTIR (in Absorbance mode) of the sample before and after acid equilibration and the results were analyzed after subtracting the signal contributed by 5% Isodecanol + 95 % n-dodecane blank using origin 2015. Figure 2 and 3 shows the ATR-FTIR spectra of the present systems in transmittance mode. The C-H scissoring peak at  $1465\text{ cm}^{-1}$  was used

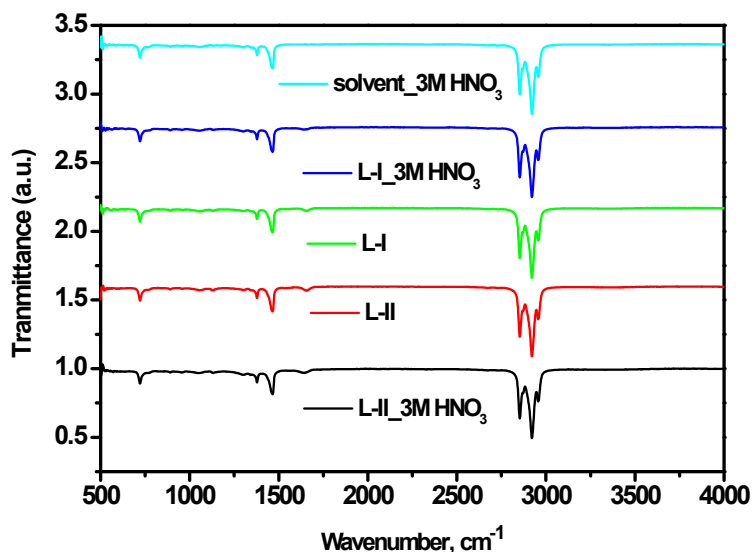

**Fig. S3.** The ATR-FTIR spectra of L-I/II dissolved in 5% Isodecanol + 95 % n-dodecane before and after acid equilibration, [Ligand] ~ 10 mM, [ $\text{HNO}_3$ ] : 3M

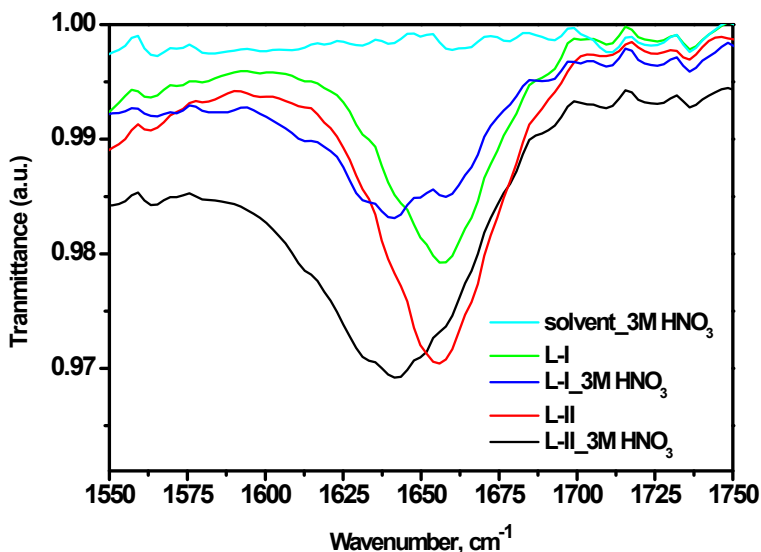

**Fig. S4.** The ATR-FTIR spectra of L-I/II dissolved in 5% Isodecanol + 95 % n-dodecane before and after acid equilibration in the 1650 -1750  $\text{cm}^{-1}$  region, [Ligand]  $\sim$  10 mM,  $[\text{HNO}_3]$  : 3M

as internal standard as this peak is not affected by the  $\text{HNO}_3$  coordination of either ligand or solvent. All the peak are normalized by the peak area of  $1465 \text{ cm}^{-1}$  peak and the peak area in region  $1550 -1750 \text{ cm}^{-1}$  was analyzed for the quantitative estimation. For the quantitative analysis, The peak area of the L-I/L-II in 5% Isodecanol + 95 % n-dodecane were fitted using in build Gaussian function of Origin 2015 and area under peak, peak centre and peak width were noted. The peak area after the acid equilibration was fitted into two peaks assuming free and acid-bound L-I/L-II in the same region. Since the peak fitting parameters for the free ligands (mainly free C=O groups) is known from the peak fitting of the L-I/L-II in 5% Isodecanol + 95 % n-dodecane before acid equilibration and fixed for initial fitting runs. The peak parameters for the peak at lower wavelength due to  $\text{HNO}_3$ -L-I/L-II is kept free as the transition integral moment and other peak parameters can change after  $\text{HNO}_3$  coordination to L-I/L-II. The area under the peak at  $1655 \text{ cm}^{-1}$  was compared before and after acid equilibration to get free and acid bound L-I/L-II. The  $K_H$  values obtained using this found to be  $0.27 (\pm 0.05)$  and  $0.32 (\pm 0.06)$  for L-I and L-II, respectively and the obtained  $K_H$  values were used for the calculation of  $L_{\text{free}}$  in the organic phase at 3M  $\text{HNO}_3$  for ligands variation experiments.

Table S2: Slope and R<sup>2</sup> value for the linear fit of ligand, nitrate and temperature variation studies

| <b>Ligand Variation</b>      |                  |                      |                |                      |
|------------------------------|------------------|----------------------|----------------|----------------------|
| <b>Ligand</b>                | <b>Np(IV)</b>    |                      | <b>Pu(IV)</b>  |                      |
|                              | <b>slope</b>     | <b>R<sup>2</sup></b> | <b>slope</b>   | <b>R<sup>2</sup></b> |
| <b>L<sub>I</sub></b>         | 1.19 ± 0.01      | 0.999                | 1.35 ± 0.06    | 0.992                |
| <b>L<sub>II</sub></b>        | 0.98 ± 0.02      | 0.998                | 1.31 ± 0.07    | 0.987                |
| <b>Nitrate Variation</b>     |                  |                      |                |                      |
| <b>Ligand</b>                | <b>Np(IV)</b>    |                      | <b>Pu(IV)</b>  |                      |
|                              | <b>slope</b>     | <b>R<sup>2</sup></b> | <b>slope</b>   | <b>R<sup>2</sup></b> |
| <b>L<sub>I</sub></b>         | 3.77 ± 0.47      | 0.962                | 3.73 ± 0.10    | 0.976                |
| <b>L<sub>II</sub></b>        | 3.74 ± 0.36      | 0.940                | 3.58 ± 0.28    | 0.997                |
| <b>Temperature Variation</b> |                  |                      |                |                      |
| <b>Ligand</b>                | <b>Np(IV)</b>    |                      | <b>Pu(IV)</b>  |                      |
|                              | <b>slope</b>     | <b>R<sup>2</sup></b> | <b>slope</b>   | <b>R<sup>2</sup></b> |
| <b>L<sub>I</sub></b>         | 979.70 ± 67.56   | 0.986                | 692.17 ± 15.35 | 0.998                |
| <b>L<sub>II</sub></b>        | 1072.48 ± 104.03 | 0.972                | 589.73 ± 43.91 | 0.984                |

## S5. DFT studies

The optimized structures for Pu(IV) complexes are given below.

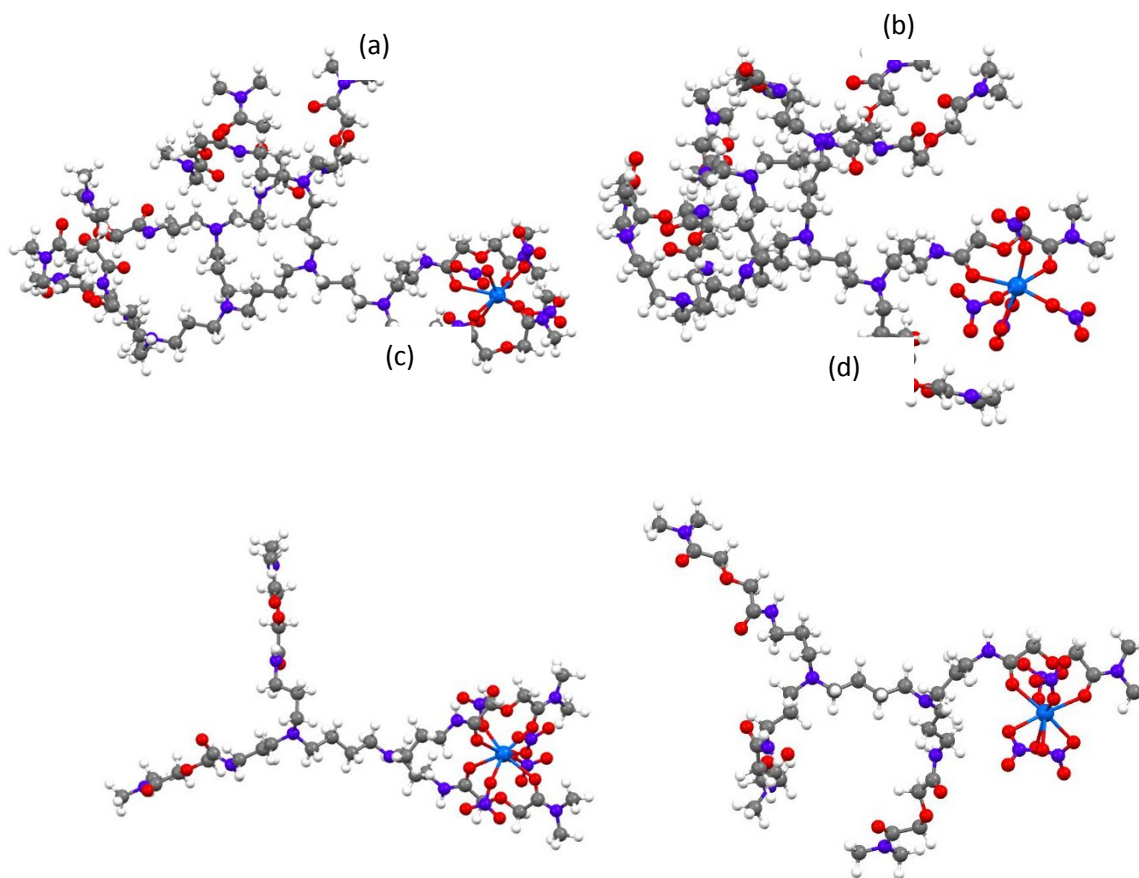

**Figure S5.** Optimized structure of complexes of  $L_I$  and  $L_{II}$  with  $Pu^{4+}$  at the B3LYP/SVP level of theory. (a)  $Pu^{4+}$  ion is coordinated to  $L_I$  with two DGA units and four monodentate nitrate ions (b)  $Pu^{4+}$  ion is coordinated to  $L_I$  with one DGA unit and two monodentate and two bidentate nitrate ions. (c)  $Pu^{4+}$  ion is coordinated to  $L_{II}$  with two DGA units and four monodentate nitrate ions (d)  $Pu^{4+}$  ion is coordinated to  $L_{II}$  with one DGA unit and three monodentate and one bidentate nitrate ions. Grey: C, Deep blue: N, Red: O, White: H and Light blue: Pu.



**Table S3:** Calculated structural parameters for the Pu<sup>4+</sup> ion complexes with L<sub>I</sub> and L<sub>II</sub> in Å at B3LYP level of theory using SVP basis set.

| System                                                 |                               |              |                                                |
|--------------------------------------------------------|-------------------------------|--------------|------------------------------------------------|
| L <sub>I</sub>                                         |                               |              |                                                |
|                                                        | Pu-O (Å)                      | Pu-O (Å)     | Pu-O (Å)                                       |
| Four nitrate ions as monodentate                       | O of C=O                      | Ether O      | O of NO <sub>3</sub>                           |
|                                                        | 2.446, 2.426,<br>2.445, 2.382 | 2.877, 2.892 | 2.301, 2.330,<br>2.360, 2.395                  |
| Two nitrate ions as monodentate and two as bidentate   | 2.394, 2.381                  | 2.774        | 2.229, 2.288,<br>2.389, 2.419,<br>2.391, 2.421 |
| L <sub>II</sub>                                        |                               |              |                                                |
|                                                        | Pu-O (Å)                      | Pu-O (Å)     | Pu-O (Å)                                       |
| Four nitrate ions as monodentate                       | O of C=O                      | Ether O      | O of NO <sub>3</sub>                           |
|                                                        | 2.382, 2.457,<br>2.498, 2.557 | 2.673, 3.317 | 2.249, 2.262,<br>2.310, 2.348                  |
| Three nitrate ions as monodentate and one as bidentate | 2.356, 2.382                  | 2.686        | 2.171, 2.208,<br>2.257<br>2.412, 2.450         |

**Table S4:** Calculated charge and orbital population using NBO analysis in gas phase at B3LYP/SVP level of theory.

| System                                                 | charge | s    | p     | d     | f    |
|--------------------------------------------------------|--------|------|-------|-------|------|
| L <sub>I</sub>                                         |        |      |       |       |      |
| Four nitrate ions as monodentate                       | 1.675  | 4.19 | 11.97 | 11.10 | 5.04 |
| Two nitrate ions as monodentate and two as bidentate   | 1.690  | 4.18 | 11.97 | 11.03 | 5.09 |
| L <sub>II</sub>                                        |        |      |       |       |      |
| Four nitrate ions as monodentate                       | 1.687  | 4.19 | 11.96 | 11.09 | 5.04 |
| Three nitrate ions as monodentate and one as bidentate | 1.817  | 4.17 | 11.96 | 10.99 | 5.04 |

### Optimized coordinates

[L<sub>I</sub>-Np(NO<sub>3</sub>)<sub>4</sub>] (all nitrate monodentate)

|   |            |             |            |
|---|------------|-------------|------------|
| C | -3.9623261 | -1.2637697  | -2.3083313 |
| H | -4.5719723 | -2.1284507  | -2.6186692 |
| H | -4.6008339 | -0.3641360  | -2.3077771 |
| H | -3.1374292 | -1.1267026  | -3.0191373 |
| C | -1.5500233 | -1.7877101  | 0.6226673  |
| H | -1.9105797 | -1.0582149  | 1.3708523  |
| H | -1.8588914 | -2.8105708  | 0.9008343  |
| C | 0.6409923  | -1.9892882  | 1.6106925  |
| H | 0.4469569  | -1.2708631  | 2.4279430  |
| H | 0.4836278  | -3.0257496  | 1.9631159  |
| C | 4.4683248  | -1.9359978  | 1.6563250  |
| C | 5.0017988  | -3.1937539  | 0.9643626  |
| H | 5.0366662  | -1.7047038  | 2.5714612  |
| H | 4.5603270  | -1.0723902  | 0.9800817  |
| C | 6.4093395  | -2.9763034  | 0.3739023  |
| H | 5.0017261  | -4.0403117  | 1.6735231  |
| H | 4.2962447  | -3.4556018  | 0.1606464  |
| H | 6.3827720  | -2.0854073  | -0.2771444 |
| H | 7.1153925  | -2.7229276  | 1.1828746  |
| C | 7.5294718  | -5.1524507  | 0.4746172  |
| C | 8.9619870  | -4.8613249  | 0.9408862  |
| H | 7.5343768  | -6.0939747  | -0.0990086 |
| H | 6.8905451  | -5.3575625  | 1.3623063  |
| C | 9.4756605  | -5.8774128  | 1.9644184  |
| H | 9.6189012  | -4.8351864  | 0.0530805  |
| H | 9.0094555  | -3.8478125  | 1.3776783  |
| C | 10.9473617 | -5.6731935  | 2.3376874  |
| H | 8.8526335  | -5.8171144  | 2.8746308  |
| H | 9.3535841  | -6.9083466  | 1.5869195  |
| H | 11.5578870 | -5.8420774  | 1.4359256  |
| H | 11.1121515 | -4.6048275  | 2.6159361  |
| C | 12.8286312 | -6.9138057  | 3.3081073  |
| C | 13.1640764 | -7.9220796  | 2.2036300  |
| H | 13.4682735 | -6.0064289  | 3.1875043  |
| H | 13.1255082 | -7.3599664  | 4.2703036  |
| C | 14.6514491 | -8.2961840  | 2.1963808  |
| H | 12.5549938 | -8.8297230  | 2.3467406  |
| H | 12.8883954 | -7.5123059  | 1.2151220  |
| H | 15.2723504 | -7.3857920  | 2.1098289  |
| H | 14.9271160 | -8.7914178  | 3.1395422  |
| C | 15.6450930 | -11.3483087 | 0.1137053  |
| H | 14.9149148 | -12.1850893 | 0.1086001  |
| H | 15.4734832 | -10.7584082 | -0.8135524 |
| C | 17.2598156 | -12.7705028 | -0.7965511 |
| H | 17.0990609 | -12.3662158 | -1.8211425 |
| H | 16.5981035 | -13.6582826 | -0.7027633 |
| C | 20.5203782 | -14.6858849 | -1.3633404 |

|   |            |             |            |
|---|------------|-------------|------------|
| H | 21.0775566 | -14.5914376 | -2.3125244 |
| H | 21.0260386 | -14.1022453 | -0.5851046 |
| H | 20.5187087 | -15.7525861 | -1.0718050 |
| N | -3.4298098 | -1.5035822  | -0.9678590 |
| N | 19.1653788 | -14.1832996 | -1.5083295 |
| C | -4.3889894 | -1.9063631  | 0.0477036  |
| H | -5.2824658 | -1.2659127  | -0.0220841 |
| H | -4.7039039 | -2.9556630  | -0.0932393 |
| H | -3.9805095 | -1.7928587  | 1.0588550  |
| C | 18.3362232 | -14.8707600 | -2.4775721 |
| H | 18.8901107 | -14.9927050 | -3.4246855 |
| H | 18.0413608 | -15.8813824 | -2.1333320 |
| H | 17.4230403 | -14.3089636 | -2.7081429 |
| C | 18.7299590 | -13.1970338 | -0.6467692 |
| C | -2.1077218 | -1.4300300  | -0.7549554 |
| O | -1.3275416 | -1.0796062  | -1.6526875 |
| O | 19.4519088 | -12.6808434 | 0.1815236  |
| O | -0.1534529 | -1.7091271  | 0.4882250  |
| O | 16.9619687 | -11.8199725 | 0.1770554  |
| C | 15.3605769 | -10.5218773 | 1.3748016  |
| C | 2.0813286  | -1.8355675  | 1.1340715  |
| O | 2.3331507  | -1.5320073  | -0.0383365 |
| O | 15.4274008 | -11.0142095 | 2.4838308  |
| N | 3.0562443  | -2.0414856  | 2.0264493  |
| H | 2.8078151  | -2.3329529  | 2.9650164  |
| N | 15.0083364 | -9.2224899  | 1.1361916  |
| H | 15.0102695 | -8.8854658  | 0.1811379  |
| N | 6.9717149  | -4.0999689  | -0.3716686 |
| N | 11.4129300 | -6.5703496  | 3.3891928  |
| C | 10.9446305 | -6.2094599  | 4.7308018  |
| C | 10.0580438 | -7.2636677  | 5.4072170  |
| H | 11.8093950 | -5.9893467  | 5.3884095  |
| H | 10.3756613 | -5.2638653  | 4.6782826  |
| C | 10.7495265 | -8.6130511  | 5.6332608  |
| H | 9.7218992  | -6.8604937  | 6.3807848  |
| H | 9.1525115  | -7.4302535  | 4.7998277  |
| H | 10.9791886 | -9.0797328  | 4.6647104  |
| H | 11.7034611 | -8.4628232  | 6.1716851  |
| C | 8.5003621  | -11.4639225 | 6.7951516  |
| H | 7.4814940  | -11.5915777 | 6.3783198  |
| H | 8.9691476  | -12.4689535 | 6.8240153  |
| C | 7.9430438  | -11.6028230 | 9.1047962  |
| H | 8.4333316  | -12.5964177 | 9.1884434  |
| H | 6.8601718  | -11.7927689 | 8.9458259  |
| C | 7.8803288  | -10.6907036 | 12.8238413 |
| H | 8.5297502  | -11.2886536 | 13.4893243 |
| H | 8.3631696  | -9.7272438  | 12.6225224 |
| H | 6.9214653  | -10.5192545 | 13.3442187 |
| N | 7.6611971  | -11.3729921 | 11.5596872 |
| C | 7.0322944  | -12.6764022 | 11.6475790 |
| H | 7.6967224  | -13.4200324 | 12.1282120 |
| H | 6.1119234  | -12.6134675 | 12.2542388 |

|    |            |             |            |
|----|------------|-------------|------------|
| H  | 6.7477715  | -13.0615057 | 10.6615542 |
| C  | 8.1543383  | -10.8076930 | 10.4070897 |
| O  | 8.7310428  | -9.7362094  | 10.3888789 |
| O  | 8.4852533  | -10.8581748 | 8.0621548  |
| C  | 9.3057646  | -10.6094205 | 5.8092758  |
| N  | 9.9358525  | -9.5528918  | 6.3793218  |
| H  | 9.7669422  | -9.4072662  | 7.3719718  |
| C  | 6.1575894  | -4.5820378  | -1.4819570 |
| C  | 5.8343908  | -3.5005932  | -2.5179382 |
| H  | 6.7220143  | -5.3917665  | -1.9760310 |
| H  | 5.2012981  | -5.0451651  | -1.1442537 |
| C  | 4.9002319  | -4.0271410  | -3.6132470 |
| H  | 5.3338813  | -2.6426361  | -2.0458354 |
| H  | 6.7715961  | -3.1163098  | -2.9562460 |
| H  | 5.3890488  | -4.8031311  | -4.2241606 |
| H  | 4.0083546  | -4.4789927  | -3.1534914 |
| C  | 3.0280040  | -1.0978264  | -5.2118496 |
| H  | 3.9288064  | -0.6233320  | -5.6435711 |
| H  | 2.4294305  | -1.5805480  | -6.0071344 |
| C  | 1.8190922  | 0.9783398   | -5.2016820 |
| H  | 1.3124958  | 0.7061462   | -6.1473001 |
| H  | 2.6736127  | 1.6465089   | -5.4045646 |
| C  | -0.4717937 | 3.5970949   | -3.5981154 |
| H  | -0.0245001 | 4.5628494   | -3.3118189 |
| H  | -1.4541379 | 3.7833495   | -4.0640099 |
| H  | -0.6019171 | 2.9781038   | -2.7032206 |
| N  | 0.4140275  | 2.9095583   | -4.5342436 |
| C  | 0.8849750  | 3.6840982   | -5.6725834 |
| H  | 0.0495766  | 4.2788790   | -6.0733619 |
| H  | 1.6957415  | 4.3744776   | -5.3806392 |
| H  | 1.2429770  | 3.0365070   | -6.4820153 |
| C  | 0.8150424  | 1.6570469   | -4.2709575 |
| O  | 0.3744067  | 1.0231767   | -3.2986361 |
| O  | 2.2459422  | -0.1668968  | -4.5133418 |
| C  | 3.4351305  | -2.1481749  | -4.1884946 |
| O  | 2.8285050  | -2.2555562  | -3.1159186 |
| N  | 4.4308191  | -2.9808383  | -4.5210712 |
| H  | 4.9689649  | -2.7793330  | -5.3562648 |
| N  | 0.2415600  | -4.0369321  | -0.8608482 |
| O  | 0.9920082  | -4.5211765  | -0.0180444 |
| O  | 0.7590718  | -3.2269731  | -1.7395901 |
| O  | -0.9575053 | -4.2835209  | -0.9286118 |
| N  | 0.1485618  | 0.9963738   | 0.6179366  |
| O  | 1.0087755  | 0.9681834   | 1.4928846  |
| O  | 0.5144004  | 0.8183171   | -0.6178869 |
| O  | -1.0424798 | 1.1965617   | 0.8405047  |
| N  | 3.8751226  | 0.8342908   | -2.6962624 |
| O  | 3.7041625  | 1.9789890   | -3.1028595 |
| O  | 4.8503990  | 0.1469460   | -2.9908409 |
| O  | 2.9825713  | 0.3281300   | -1.8981044 |
| Np | 1.0428673  | -0.9485934  | -2.0377798 |
| N  | -0.5718828 | -1.2842543  | -5.0579048 |

|   |            |             |            |
|---|------------|-------------|------------|
| O | 0.0374607  | -1.3895880  | -6.1264327 |
| O | -0.0004095 | -1.7446279  | -3.9863887 |
| O | -1.6853233 | -0.7835356  | -4.9695781 |
| O | 9.3566997  | -10.9166953 | 4.6294002  |

[L<sub>T</sub>-Np(NO<sub>3</sub>)<sub>4</sub>] (two monodentate and two bidentate nitrate)

|   |            |             |            |
|---|------------|-------------|------------|
| C | -4.6545520 | 0.5640591   | -3.1489483 |
| H | -5.2661304 | -0.1618764  | -3.7081343 |
| H | -5.1894555 | 1.5277826   | -3.1154192 |
| H | -3.6921317 | 0.6980623   | -3.6546128 |
| C | -2.9446551 | -0.5792935  | 0.0849532  |
| H | -3.4042651 | 0.0880029   | 0.8347225  |
| H | -3.3694113 | -1.5962331  | 0.1640285  |
| C | -1.0817454 | -0.9936607  | 1.5322895  |
| H | -1.4308232 | -0.2760550  | 2.2993822  |
| H | -1.4156630 | -2.0132332  | 1.7943882  |
| C | 2.6306829  | -1.5366772  | 2.3395736  |
| C | 3.2148175  | -2.7366569  | 1.5824995  |
| H | 2.9994550  | -1.4967428  | 3.3769388  |
| H | 2.9306132  | -0.6007424  | 1.8463041  |
| C | 4.6822415  | -2.4720580  | 1.1708118  |
| H | 3.1464082  | -3.6476375  | 2.2033888  |
| H | 2.6042557  | -2.9180318  | 0.6831910  |
| H | 4.6909776  | -1.6037876  | 0.4860356  |
| H | 5.2595432  | -2.1575630  | 2.0588000  |
| C | 5.9583487  | -4.5604992  | 1.4508144  |
| C | 7.3911011  | -4.2079384  | 1.8753536  |
| H | 5.9685373  | -5.5444549  | 0.9538591  |
| H | 5.3283366  | -4.7003335  | 2.3563130  |
| C | 8.0534836  | -5.2456752  | 2.7845841  |
| H | 7.9909305  | -4.0733517  | 0.9583466  |
| H | 7.3871733  | -3.2225184  | 2.3763262  |
| C | 9.4935387  | -4.8675069  | 3.1476333  |
| H | 7.4525895  | -5.3752648  | 3.7037842  |
| H | 8.0713439  | -6.2336771  | 2.2911241  |
| H | 10.0562523 | -4.7530853  | 2.2085754  |
| H | 9.5037365  | -3.8600806  | 3.6262793  |
| C | 11.6277794 | -5.8771865  | 3.7730502  |
| C | 12.0601378 | -6.5107044  | 2.4468034  |
| H | 12.0616769 | -4.8509445  | 3.8522996  |
| H | 12.0849444 | -6.4532787  | 4.5920734  |
| C | 13.5864210 | -6.5443141  | 2.2895805  |
| H | 11.6609277 | -7.5362678  | 2.3845650  |
| H | 11.6286882 | -5.9513752  | 1.5983375  |
| H | 14.0090528 | -5.5411844  | 2.4799230  |
| H | 14.0242356 | -7.2358831  | 3.0251186  |
| C | 14.9001821 | -8.5430990  | -0.6927514 |
| H | 14.7317397 | -7.6657822  | -1.3545350 |
| H | 15.9998052 | -8.6837214  | -0.6153213 |
| C | 14.9163035 | -10.2361420 | -2.3041287 |

|   |            |             |            |
|---|------------|-------------|------------|
| H | 15.9398187 | -10.5734586 | -2.0362574 |
| H | 15.0326032 | -9.4917163  | -3.1236301 |
| C | 13.9411271 | -13.3243885 | -4.3411100 |
| H | 14.5277051 | -14.2496213 | -4.1932547 |
| H | 12.9914606 | -13.4075639 | -3.7992346 |
| H | 13.7360830 | -13.2199139 | -5.4224800 |
| N | -4.4277541 | 0.0648067   | -1.7929755 |
| N | 14.6608874 | -12.1698389 | -3.8350824 |
| C | -5.6189852 | -0.3243603  | -1.0524460 |
| H | -6.3370666 | 0.5120980   | -1.0378451 |
| H | -6.1060019 | -1.1899387  | -1.5325289 |
| H | -5.3871745 | -0.5865775  | -0.0143555 |
| C | 15.9625253 | -11.9354264 | -4.4247505 |
| H | 16.6733943 | -12.7476491 | -4.1788093 |
| H | 15.8834957 | -11.8889467 | -5.5264414 |
| H | 16.4015451 | -10.9895587 | -4.0884395 |
| C | 14.0862599 | -11.4204716 | -2.8277012 |
| C | -3.1808605 | -0.0173757  | -1.3125390 |
| O | -2.2012860 | 0.3569932   | -1.9818835 |
| O | 12.9851747 | -11.6623108 | -2.3770880 |
| O | -1.5478403 | -0.6180653  | 0.2565380  |
| O | 14.2733000 | -9.6864331  | -1.1976999 |
| C | 14.3996469 | -8.2866362  | 0.7352239  |
| C | 0.4370910  | -0.9384843  | 1.4392657  |
| O | 0.9629601  | -0.3074235  | 0.5072102  |
| O | 14.4057064 | -9.1586425  | 1.5799971  |
| N | 1.1639206  | -1.5262704  | 2.3877125  |
| H | 0.6901258  | -2.1092031  | 3.0698626  |
| N | 14.0312875 | -6.9921914  | 0.9811317  |
| H | 13.9390685 | -6.3562421  | 0.1977659  |
| N | 5.3852345  | -3.5737012  | 0.5436858  |
| N | 10.1793800 | -5.8574191  | 3.9762636  |
| C | 9.7759437  | -5.8079009  | 5.3819966  |
| C | 9.4823623  | -7.1699270  | 6.0276317  |
| H | 10.5248571 | -5.2599404  | 5.9957265  |
| H | 8.8517178  | -5.2138057  | 5.4535507  |
| C | 10.6982136 | -8.0548323  | 6.2983335  |
| H | 8.9749387  | -6.9724986  | 6.9927621  |
| H | 8.7650143  | -7.7171202  | 5.3928088  |
| H | 11.1875085 | -8.3741244  | 5.3659655  |
| H | 11.4582929 | -7.4875528  | 6.8718557  |
| C | 10.5362416 | -11.5536461 | 7.8320980  |
| H | 9.5585955  | -11.3027736 | 8.3002174  |
| H | 10.3485652 | -12.3731265 | 7.1065390  |
| C | 11.1932095 | -13.1513265 | 9.4050335  |
| H | 11.1651124 | -13.9712337 | 8.6555402  |
| H | 10.1941016 | -13.1386769 | 9.8953155  |
| C | 13.1863239 | -15.0157066 | 12.0867049 |
| H | 13.7379093 | -15.9203470 | 11.7704887 |
| H | 13.8892857 | -14.1793306 | 12.1783747 |
| H | 12.7308450 | -15.2203179 | 13.0725958 |
| N | 12.1704300 | -14.6602002 | 11.1118260 |

|   |            |             |             |
|---|------------|-------------|-------------|
| C | 11.1626005 | -15.6699044 | 10.8602541  |
| H | 11.5975352 | -16.5710077 | 10.3866430  |
| H | 10.6941633 | -15.9894962 | 11.8089713  |
| H | 10.3633579 | -15.2987826 | 10.2088691  |
| C | 12.2700202 | -13.4455287 | 10.4637287  |
| O | 13.1468514 | -12.6416483 | 10.7062215  |
| O | 11.4777914 | -11.9312256 | 8.7968592   |
| C | 11.1025996 | -10.3764121 | 7.0269955   |
| N | 10.3146517 | -9.2599369  | 7.0149698   |
| H | 9.5409321  | -9.2012109  | 7.6668819   |
| C | 4.8224717  | -4.0571900  | -0.7084369  |
| C | 5.8593630  | -4.6718438  | -1.6556606  |
| H | 4.0006182  | -4.7954747  | -0.5524503  |
| H | 4.3562394  | -3.1947193  | -1.2154101  |
| C | 5.2472992  | -5.0572568  | -3.0098073  |
| H | 6.6804436  | -3.9540038  | -1.8147000  |
| H | 6.3054898  | -5.5724597  | -1.1972870  |
| H | 4.3184325  | -5.6345530  | -2.8555202  |
| H | 4.9797298  | -4.1483838  | -3.5700519  |
| C | 7.8361500  | -6.2628935  | -5.5396551  |
| H | 8.7702766  | -6.3764304  | -4.9589571  |
| H | 7.3425869  | -7.2579775  | -5.5811721  |
| C | 8.6428256  | -6.7054311  | -7.7251807  |
| H | 8.5568438  | -6.2515248  | -8.7265478  |
| H | 8.0561092  | -7.6506712  | -7.7430035  |
| C | 12.1565675 | -8.2051010  | -8.1095096  |
| H | 12.2661170 | -9.2983225  | -7.9852478  |
| H | 12.7921386 | -7.8915080  | -8.9572136  |
| H | 12.4946074 | -7.7024186  | -7.1957176  |
| N | 10.7693747 | -7.8463690  | -8.3479239  |
| C | 10.1665171 | -8.4275156  | -9.5312971  |
| H | 10.7500134 | -8.1677750  | -10.4333655 |
| H | 10.1370552 | -9.5315186  | -9.4625008  |
| H | 9.1414124  | -8.0738796  | -9.6855969  |
| C | 10.1226333 | -7.0403225  | -7.4389085  |
| O | 10.6736066 | -6.6066313  | -6.4406107  |
| O | 8.1017016  | -5.7866684  | -6.8335765  |
| C | 6.9255953  | -5.2606033  | -4.8209521  |
| O | 6.9290451  | -4.0711766  | -5.0618138  |
| N | 6.1310789  | -5.8338035  | -3.8620581  |
| H | 6.2027092  | -6.8313536  | -3.6995797  |
| N | -0.7185383 | -2.7209366  | -1.2211927  |
| O | -0.2475854 | -3.2893214  | -0.2432535  |
| O | 0.0296559  | -1.8115997  | -1.8134047  |
| O | -1.8276736 | -2.9378870  | -1.6801731  |
| N | -0.8782327 | 2.4144031   | 0.9224440   |
| O | -0.0717556 | 2.9891074   | 1.6165055   |
| O | -0.5301997 | 2.1443173   | -0.3306595  |
| O | -2.0013939 | 2.0659469   | 1.2761359   |
| N | 2.4721726  | 2.1429495   | -1.9246710  |
| O | 3.4372733  | 2.8358550   | -2.0393379  |
| O | 2.4424338  | 1.0941369   | -1.1818647  |

|    |            |             |            |
|----|------------|-------------|------------|
| O  | 1.3636872  | 2.3697195   | -2.5274426 |
| Np | 0.1674975  | 0.4594420   | -1.6381280 |
| N  | 0.6157162  | 0.1975938   | -4.4633481 |
| O  | 1.4520079  | -0.2208846  | -3.5901850 |
| O  | -0.4436714 | 0.7220510   | -3.9523425 |
| O  | 0.7915481  | 0.1067420   | -5.6412691 |
| O  | 12.1487080 | -10.4648127 | 6.4163948  |

[L<sub>II</sub>-Np(NO<sub>3</sub>)<sub>4</sub>] (all nitrate monodentate)

|   |            |             |            |
|---|------------|-------------|------------|
| C | 19.2126132 | -10.4041543 | 9.7564006  |
| N | 19.1772876 | -11.7234725 | 10.3616361 |
| C | 19.2944223 | -11.7909364 | 11.8097769 |
| C | 19.1059529 | -12.8286678 | 9.5493372  |
| C | 19.2028303 | -14.1780312 | 10.2627122 |
| O | 19.2950817 | -15.2082190 | 9.3146547  |
| C | 19.3271276 | -16.4682822 | 9.9138604  |
| C | 19.2227520 | -17.5520987 | 8.8428446  |
| O | 18.5679613 | -17.4009162 | 7.8215672  |
| O | 18.9723778 | -12.7451609 | 8.3364117  |
| N | 19.8629623 | -18.7209863 | 9.1432994  |
| C | 19.6585363 | -19.9101458 | 8.3314825  |
| C | 20.9230057 | -20.7074794 | 8.0071190  |
| C | 20.6854362 | -21.7282631 | 6.8778240  |
| N | 19.6448055 | -22.7218594 | 7.1546834  |
| C | 18.8491366 | -23.1512178 | 5.9974633  |
| C | 17.3978493 | -22.6336048 | 5.9893267  |
| C | 17.3391078 | -21.1126647 | 5.8347747  |
| N | 16.0202074 | -20.4947379 | 5.8987328  |
| C | 15.5191912 | -19.9440572 | 7.0339451  |
| C | 14.2383391 | -19.1051922 | 6.8522285  |
| O | 14.3004713 | -17.8657307 | 7.4882689  |
| C | 15.2845565 | -16.9869090 | 6.9833211  |
| C | 15.0053931 | -15.5716719 | 7.5184909  |
| N | 15.8623525 | -14.5961627 | 7.1073075  |
| C | 15.5811239 | -13.2112781 | 7.4528618  |
| C | 20.1167908 | -23.8223750 | 7.9915552  |
| C | 19.0090298 | -24.5335099 | 8.7705615  |
| C | 19.5342104 | -25.6976982 | 9.6189718  |
| N | 18.4985292 | -26.3181163 | 10.4335051 |
| C | 18.7753313 | -27.6909406 | 10.8430518 |
| C | 17.5026516 | -28.4705685 | 11.1855834 |
| C | 17.7430200 | -29.8341304 | 11.8397976 |
| C | 16.4165438 | -30.5547448 | 12.1365008 |
| N | 16.4720369 | -31.4804683 | 13.2638172 |
| C | 17.2464923 | -32.6838054 | 12.9741388 |
| C | 17.8400875 | -33.3597229 | 14.2168894 |
| C | 18.6623664 | -34.5964420 | 13.8459905 |
| N | 19.4154307 | -35.2105719 | 14.9414024 |
| C | 18.5702777 | -35.8137541 | 15.9809402 |



|   |            |             |            |
|---|------------|-------------|------------|
| C | 18.1532205 | -34.8957890 | 17.1471472 |
| C | 19.2846199 | -33.9755433 | 17.6228542 |
| N | 19.1141456 | -33.5131762 | 18.9991565 |
| C | 19.8043170 | -34.0374111 | 20.0238003 |
| C | 19.4693768 | -33.5504316 | 21.4256966 |
| O | 20.5978553 | -33.8540110 | 22.2036792 |
| C | 20.4888714 | -33.5893972 | 23.5778128 |
| C | 21.7844673 | -34.1034479 | 24.1990919 |
| N | 22.0628258 | -33.8362376 | 25.4864780 |
| C | 23.2898991 | -34.3624097 | 26.0855866 |
| C | 18.0158026 | -25.4620409 | 11.5216781 |
| C | 16.5300373 | -25.0870886 | 11.4483741 |
| C | 16.1814203 | -24.0023738 | 12.4822766 |
| N | 14.7688702 | -23.7297638 | 12.7244101 |
| C | 13.9968331 | -23.3636992 | 11.5429345 |
| C | 14.4971630 | -22.1172728 | 10.8072633 |
| C | 14.4943777 | -20.8641324 | 11.6767019 |
| N | 14.9884661 | -19.7076287 | 10.9487546 |
| C | 14.9421600 | -18.4652466 | 11.4847117 |
| C | 15.4719220 | -17.3615350 | 10.5626411 |
| O | 15.9382764 | -16.2296716 | 11.2593028 |
| C | 14.9136118 | -15.3510026 | 11.6465473 |
| C | 15.5128520 | -14.1199905 | 12.3241208 |
| N | 14.6087606 | -13.2107198 | 12.8194587 |
| C | 15.0862770 | -12.0615347 | 13.5666112 |
| C | 14.0581742 | -24.6931552 | 13.5628495 |
| C | 14.6940563 | -24.9736459 | 14.9334316 |
| C | 15.1175622 | -23.7064217 | 15.7115011 |
| N | 14.6191663 | -23.6023371 | 17.0731379 |
| C | 15.0106200 | -24.3995541 | 18.0706921 |
| C | 14.4671094 | -24.0586931 | 19.4516002 |
| O | 13.8558697 | -22.7973631 | 19.4649974 |
| C | 13.4054757 | -22.4222827 | 20.7355171 |
| C | 12.9171404 | -20.9710983 | 20.6877936 |
| N | 12.4868658 | -20.4376408 | 21.8803655 |
| C | 11.9932395 | -19.0734911 | 21.9012824 |
| O | 15.7609438 | -25.3786371 | 17.9274462 |
| O | 16.0455954 | -20.0824277 | 8.1343256  |
| O | 14.0478994 | -15.3642856 | 8.2565049  |
| C | 17.0676835 | -14.8151438 | 6.3163692  |
| C | 15.1577859 | -31.7775471 | 13.8290105 |
| C | 14.4262625 | -30.5627568 | 14.4176693 |
| C | 13.3224666 | -30.9706408 | 15.3995491 |
| N | 12.4722654 | -29.8592458 | 15.8256779 |
| C | 11.4334896 | -29.5175802 | 14.8452971 |
| C | 11.3160989 | -28.0296837 | 14.4785711 |
| C | 10.6378360 | -27.1284939 | 15.5219417 |
| N | 10.5181774 | -25.7430434 | 15.0910163 |
| C | 9.5884366  | -25.3435499 | 14.1891345 |
| C | 9.6088403  | -23.8461587 | 13.8628929 |
| O | 10.6989330 | -23.2235670 | 14.4914357 |
| C | 10.7600900 | -21.8285768 | 14.4109304 |

|   |            |             |            |
|---|------------|-------------|------------|
| C | 11.8254114 | -21.3451458 | 15.4162033 |
| N | 12.1070228 | -20.0166639 | 15.4433406 |
| C | 13.1060928 | -19.5306782 | 16.3914620 |
| C | 12.0070036 | -30.0050633 | 17.2068761 |
| C | 13.0638128 | -29.6194836 | 18.2515546 |
| C | 13.3071306 | -28.1073563 | 18.2809979 |
| N | 14.4448062 | -27.6668167 | 19.0762115 |
| C | 14.4930123 | -27.8079545 | 20.4206153 |
| C | 15.6601957 | -27.0788707 | 21.1044288 |
| O | 15.1855086 | -26.0692501 | 21.9753095 |
| C | 14.6808336 | -26.5324309 | 23.1981640 |
| C | 14.0280433 | -25.3689553 | 23.9507747 |
| N | 13.5409985 | -25.6640309 | 25.2019993 |
| C | 12.9879585 | -24.6012721 | 26.0227726 |
| O | 13.6642638 | -28.4347250 | 21.0794196 |
| C | 20.4490991 | -36.1203117 | 14.4413253 |
| C | 21.7447018 | -36.2151476 | 15.2675404 |
| C | 21.6635133 | -36.9849088 | 16.5894688 |
| N | 22.9872030 | -37.3646502 | 17.0827043 |
| C | 23.3760826 | -37.3006152 | 18.3607925 |
| C | 24.7444222 | -37.8815162 | 18.7081191 |
| O | 24.7520126 | -38.4771422 | 19.9684202 |
| C | 24.0277299 | -39.6608786 | 20.1418991 |
| C | 22.9736711 | -39.5241340 | 21.2503826 |
| N | 22.3453997 | -40.6374816 | 21.6622638 |
| C | 21.2383503 | -40.5495548 | 22.6134466 |
| O | 22.6674966 | -36.8015339 | 19.2454238 |
| O | 20.7215378 | -36.6571834 | 23.1833375 |
| N | 19.4573140 | -36.9996018 | 23.2885738 |
| O | 19.1960083 | -38.1482238 | 23.5864132 |
| O | 24.7968145 | -32.8205881 | 20.1929606 |
| N | 24.3830644 | -33.9459899 | 20.0062885 |
| O | 23.2722120 | -34.2851403 | 20.6344335 |
| O | 20.6774314 | -34.8941441 | 19.8739687 |
| O | 22.5532364 | -34.7687952 | 23.4933885 |
| O | 22.7328311 | -38.4184258 | 21.7584278 |
| O | 24.9054528 | -34.7727612 | 19.2655044 |
| C | 21.1810585 | -33.1064244 | 26.3816771 |
| C | 22.5187195 | -41.9362326 | 21.0285025 |
| O | 8.7691006  | -26.0795465 | 13.6604101 |
| O | 12.3576243 | -22.1609162 | 16.1591886 |
| C | 11.6367337 | -19.0395447 | 14.4713376 |
| O | 13.9486380 | -24.2518983 | 23.4622168 |
| C | 13.6022108 | -26.9734670 | 25.8255199 |
| O | 14.4767930 | -18.2283836 | 12.5981739 |
| O | 16.7220228 | -13.9533605 | 12.4199167 |
| C | 13.1670061 | -13.3706863 | 12.7587802 |
| O | 12.9094150 | -20.3357080 | 19.6463079 |
| C | 12.4795276 | -21.1300670 | 23.1558544 |
| O | 18.6135880 | -36.1173289 | 23.1254657 |
| O | 20.3734652 | -37.4658023 | 20.6774565 |
| N | 20.1370028 | -38.0415346 | 19.5459705 |

|   |            |             |            |
|---|------------|-------------|------------|
| O | 20.8198276 | -39.0205504 | 19.2200486 |
| O | 19.2281056 | -37.6056733 | 18.8445593 |
| H | 15.6742101 | -29.7835062 | 12.3840224 |
| H | 16.0370351 | -31.0500062 | 11.2105994 |
| H | 18.2724465 | -29.6929171 | 12.7982624 |
| H | 18.4013933 | -30.4516658 | 11.2029374 |
| H | 16.8975265 | -28.5770641 | 10.2670756 |
| H | 16.8905718 | -27.8716416 | 11.8794927 |
| H | 19.4707896 | -27.7292591 | 11.7161220 |
| H | 19.2967194 | -28.1998722 | 10.0148479 |
| H | 21.3093340 | -21.2137202 | 8.9107603  |
| H | 21.7188378 | -20.0172260 | 7.6771965  |
| H | 19.2201632 | -19.5275700 | 7.4017259  |
| H | 18.9007526 | -20.5682085 | 8.7878508  |
| H | 18.4696758 | -16.6033459 | 10.6074140 |
| H | 20.2530907 | -16.6125389 | 10.5142778 |
| H | 20.0948599 | -14.1736878 | 10.9262951 |
| H | 18.3175032 | -14.3132801 | 10.9154374 |
| H | 18.3580148 | -9.7892956  | 10.0924398 |
| H | 20.1433722 | -9.8716384  | 10.0251636 |
| H | 19.1654447 | -10.5189631 | 8.6669946  |
| H | 20.3473702 | -11.8416667 | 12.1489985 |
| H | 18.8510239 | -10.8805940 | 12.2432268 |
| H | 18.7351628 | -12.6423263 | 12.2188353 |
| H | 20.3454120 | -18.7989242 | 10.0318345 |
| H | 16.8469855 | -23.1240273 | 5.1658021  |
| H | 16.9042599 | -22.9210026 | 6.9317701  |
| H | 17.9257296 | -20.6636703 | 6.6410513  |
| H | 17.8008254 | -20.8134558 | 4.8778467  |
| H | 14.0064525 | -18.9936552 | 5.7705595  |
| H | 13.4047702 | -19.6560751 | 7.3191140  |
| H | 15.2496582 | -16.9597228 | 5.8736373  |
| H | 16.2989687 | -17.3121071 | 7.2765718  |
| H | 16.4402444 | -12.7709782 | 7.9823299  |
| H | 15.4050122 | -12.6158872 | 6.5375238  |
| H | 14.6837526 | -13.1749773 | 8.0809542  |
| H | 16.9056306 | -14.5595989 | 5.2510347  |
| H | 17.8708556 | -14.1800841 | 6.7202205  |
| H | 17.4253300 | -15.8460902 | 6.4025994  |
| H | 15.5362501 | -20.3045019 | 5.0293716  |
| H | 20.3948730 | -25.3415947 | 10.2368340 |
| H | 19.9461080 | -26.4668101 | 8.9439741  |
| H | 18.2368552 | -24.9280290 | 8.0885506  |
| H | 18.5054327 | -23.7861414 | 9.4062770  |
| H | 20.8388620 | -23.4133313 | 8.7175042  |
| H | 20.6879164 | -24.5674456 | 7.3872986  |
| H | 17.9876696 | -35.3412934 | 13.3585987 |
| H | 19.3900549 | -34.2948905 | 13.0741200 |
| H | 17.0325272 | -33.6377898 | 14.9101276 |
| H | 18.4795772 | -32.6316696 | 14.7431571 |
| H | 18.0803560 | -32.3995433 | 12.3132469 |
| H | 16.6424902 | -33.4247230 | 12.3973358 |

|   |            |             |            |
|---|------------|-------------|------------|
| H | 16.6398630 | -24.2720602 | 13.4464813 |
| H | 16.6765537 | -23.0600131 | 12.1847158 |
| H | 15.9109143 | -25.9843142 | 11.6121052 |
| H | 16.3018765 | -24.7426674 | 10.4265190 |
| H | 18.6089971 | -24.5288135 | 11.5400668 |
| H | 18.2178701 | -25.9442276 | 12.4993002 |
| H | 20.3890686 | -21.1649415 | 5.9787180  |
| H | 21.6540532 | -22.2153371 | 6.6233875  |
| H | 19.3469155 | -22.8426697 | 5.0563920  |
| H | 18.8211525 | -24.2537842 | 5.9600626  |
| H | 12.7124440 | -31.7931606 | 14.9578627 |
| H | 13.8005465 | -31.4058760 | 16.2914464 |
| H | 13.9833157 | -29.9498873 | 13.6158292 |
| H | 15.1538007 | -29.9197363 | 14.9411052 |
| H | 15.3035804 | -32.5129509 | 14.6370756 |
| H | 14.4959289 | -32.2816796 | 13.0830192 |
| H | 17.2664954 | -34.2913799 | 16.8940727 |
| H | 17.8674581 | -35.5567015 | 17.9802267 |
| H | 20.2452380 | -34.5019030 | 17.5965021 |
| H | 19.3858459 | -33.0981448 | 16.9675433 |
| H | 19.2581888 | -32.4630174 | 21.4263817 |
| H | 18.5808704 | -34.0987823 | 21.7916440 |
| H | 19.6266631 | -34.1298196 | 24.0110975 |
| H | 20.3684375 | -32.5037849 | 23.7555757 |
| H | 23.8882002 | -33.5302789 | 26.4928527 |
| H | 23.0366680 | -35.0495190 | 26.9103504 |
| H | 23.8712247 | -34.9052193 | 25.3295423 |
| H | 20.8169292 | -33.7686566 | 27.1864468 |
| H | 21.7251946 | -32.2691990 | 26.8504535 |
| H | 20.3102862 | -32.6977827 | 25.8569175 |
| H | 18.4014226 | -32.8199771 | 19.1998045 |
| H | 22.4813169 | -36.7281515 | 14.6197790 |
| H | 22.1390854 | -35.2008296 | 15.4466174 |
| H | 21.1872987 | -36.4042590 | 17.3876447 |
| H | 21.0640483 | -37.9055580 | 16.4758049 |
| H | 25.0837589 | -38.5750069 | 17.9106523 |
| H | 25.4420773 | -37.0310310 | 18.7621380 |
| H | 24.7325200 | -40.4633648 | 20.4230791 |
| H | 23.5036963 | -39.9793231 | 19.2211868 |
| H | 20.3127381 | -40.9098973 | 22.1355847 |
| H | 21.4519600 | -41.1767789 | 23.4948316 |
| H | 21.0777233 | -39.5144412 | 22.9271266 |
| H | 22.3388557 | -42.7238358 | 21.7751687 |
| H | 21.7993520 | -42.0718326 | 20.2009930 |
| H | 23.5359848 | -42.0740374 | 20.6424134 |
| H | 23.6062977 | -37.8433934 | 16.4362032 |
| H | 19.1156014 | -36.6518679 | 16.4325448 |
| H | 17.6577383 | -36.2648381 | 15.5330102 |
| H | 20.0493290 | -37.1477701 | 14.2763888 |
| H | 20.7488291 | -35.7574642 | 13.4465619 |
| H | 12.3234814 | -27.6399924 | 14.2536055 |
| H | 10.7189661 | -27.9539365 | 13.5545272 |

|   |            |             |            |
|---|------------|-------------|------------|
| H | 9.6258478  | -27.5179956 | 15.7279570 |
| H | 11.1956225 | -27.1287463 | 16.4690308 |
| H | 9.6410446  | -23.7457666 | 12.7596792 |
| H | 8.6428458  | -23.4177791 | 14.1995549 |
| H | 9.7820916  | -21.3696934 | 14.6658839 |
| H | 11.0123694 | -21.5036610 | 13.3821877 |
| H | 12.8197766 | -18.5207395 | 16.7233316 |
| H | 13.1492365 | -20.1839266 | 17.2713366 |
| H | 14.1019402 | -19.4667042 | 15.9176215 |
| H | 11.2236608 | -18.1603623 | 14.9954646 |
| H | 12.4677276 | -18.7028667 | 13.8261261 |
| H | 10.8408155 | -19.4470656 | 13.8367650 |
| H | 11.1279807 | -25.0233188 | 15.4707575 |
| H | 12.7397344 | -29.9527579 | 19.2488543 |
| H | 14.0157084 | -30.1367467 | 18.0387988 |
| H | 13.4835068 | -27.7576720 | 17.2530909 |
| H | 12.3881115 | -27.6133505 | 18.6516576 |
| H | 16.2695999 | -27.8252406 | 21.6524920 |
| H | 16.2973919 | -26.5753164 | 20.3628444 |
| H | 15.4982874 | -26.9580540 | 23.8202391 |
| H | 13.9417152 | -27.3369925 | 23.0370808 |
| H | 11.9229028 | -24.7888596 | 26.2495747 |
| H | 13.5332924 | -24.5253582 | 26.9808075 |
| H | 13.0778051 | -23.6516301 | 25.4833635 |
| H | 14.4138987 | -27.0390574 | 26.5757257 |
| H | 12.6512841 | -27.1802931 | 26.3450520 |
| H | 13.7465739 | -27.7694579 | 25.0863472 |
| H | 15.0753642 | -26.9808056 | 18.6414671 |
| H | 10.4415911 | -29.9007063 | 15.1687105 |
| H | 11.6575153 | -30.0583334 | 13.9114923 |
| H | 11.1237074 | -29.3612502 | 17.3465962 |
| H | 11.6524357 | -31.0414647 | 17.4067002 |
| H | 15.5089971 | -22.2822320 | 10.3977804 |
| H | 13.8469712 | -21.9580638 | 9.9289725  |
| H | 13.4706955 | -20.6589271 | 12.0396234 |
| H | 15.0995539 | -21.0315612 | 12.5844630 |
| H | 16.3132151 | -17.7497425 | 9.9680612  |
| H | 14.6725542 | -17.0965749 | 9.8471596  |
| H | 14.2223415 | -15.8509799 | 12.3477142 |
| H | 14.3301166 | -15.0336607 | 10.7576670 |
| H | 14.7543550 | -11.1190165 | 13.0949880 |
| H | 14.7015634 | -12.0785138 | 14.6027222 |
| H | 16.1814519 | -12.0864932 | 13.5928089 |
| H | 12.7506510 | -13.7553621 | 13.7096270 |
| H | 12.6979454 | -12.3926241 | 12.5589139 |
| H | 12.8670005 | -14.0460398 | 11.9494211 |
| H | 15.3723716 | -19.8308664 | 10.0075552 |
| H | 13.9459105 | -25.5266260 | 15.5234600 |
| H | 15.5509681 | -25.6602465 | 14.8428345 |
| H | 16.2183618 | -23.6441742 | 15.7398667 |
| H | 14.7557045 | -22.8165744 | 15.1818130 |
| H | 13.7640383 | -24.8603496 | 19.7582457 |

|    |            |             |            |
|----|------------|-------------|------------|
| H  | 15.3101910 | -24.1159847 | 20.1660706 |
| H  | 14.2085291 | -22.5378156 | 21.4879001 |
| H  | 12.5845107 | -23.0839488 | 21.0822555 |
| H  | 10.9510362 | -19.0388329 | 22.2680037 |
| H  | 12.6091035 | -18.4415870 | 22.5673642 |
| H  | 12.0331155 | -18.6700530 | 20.8826599 |
| H  | 13.0640187 | -20.5616053 | 23.9032231 |
| H  | 11.4478010 | -21.2210271 | 23.5455405 |
| H  | 12.9110971 | -22.1356761 | 23.0934499 |
| H  | 13.9211084 | -22.8810934 | 17.2639662 |
| H  | 12.9620946 | -23.1785114 | 11.8800829 |
| H  | 13.9238268 | -24.2013051 | 10.8111774 |
| H  | 13.0512674 | -24.2769269 | 13.7309764 |
| H  | 13.9012833 | -25.6698096 | 13.0464478 |
| Np | 22.2307823 | -36.1171155 | 21.4792323 |
| N  | 25.0144542 | -37.0209813 | 23.1218050 |
| O  | 25.5168342 | -38.0794420 | 22.8014127 |
| O  | 24.3532827 | -36.3350160 | 22.1919481 |
| O  | 25.0938937 | -36.5196756 | 24.2333150 |

[L<sub>III</sub>-Np(NO<sub>3</sub>)<sub>4</sub>] (three monodentate and one bidentate nitrate)

|   |            |             |            |
|---|------------|-------------|------------|
| C | 19.6630397 | -10.9903134 | 10.6007815 |
| N | 19.5567753 | -12.3480960 | 11.1032978 |
| C | 19.6549413 | -12.5316626 | 12.5430057 |
| C | 19.4341637 | -13.3827323 | 10.2092045 |
| C | 19.4492543 | -14.7861023 | 10.8172403 |
| O | 19.5208228 | -15.7418662 | 9.7920131  |
| C | 19.5146042 | -17.0456667 | 10.2869988 |
| C | 19.3603222 | -18.0353801 | 9.1331338  |
| O | 18.7082791 | -17.7741690 | 8.1327118  |
| O | 19.3192145 | -13.2006703 | 9.0049828  |
| N | 19.9501018 | -19.2509797 | 9.3340640  |
| C | 19.6910122 | -20.3607021 | 8.4298519  |
| C | 20.9152330 | -21.1955180 | 8.0507884  |
| C | 20.6364814 | -22.1124424 | 6.8441853  |
| N | 19.5465218 | -23.0717252 | 7.0382161  |
| C | 18.7372852 | -23.3685383 | 5.8496658  |
| C | 17.3157012 | -22.7741506 | 5.8758416  |
| C | 17.3372054 | -21.2452678 | 5.8243807  |
| N | 16.0509077 | -20.5657462 | 5.9219169  |
| C | 15.5698556 | -20.0614720 | 7.0868826  |
| C | 14.3333772 | -19.1505367 | 6.9528520  |
| O | 14.4497871 | -17.9609263 | 7.6711640  |
| C | 15.4845872 | -17.1024732 | 7.2368165  |
| C | 15.2645044 | -15.7107123 | 7.8545047  |
| N | 16.1831533 | -14.7592427 | 7.5295630  |
| C | 15.9635434 | -13.3849851 | 7.9537784  |
| C | 19.9579121 | -24.2561800 | 7.7881635  |
| C | 18.8130470 | -24.9674225 | 8.5116748  |
| C | 19.2816411 | -26.2009985 | 9.2930114  |
| N | 18.2203810 | -26.8078692 | 10.0852799 |
| C | 18.4438168 | -28.2058022 | 10.4419148 |

|   |            |             |            |
|---|------------|-------------|------------|
| C | 17.1426815 | -28.9399326 | 10.7799966 |
| C | 17.3299210 | -30.3184306 | 11.4209663 |
| C | 15.9766986 | -30.9790364 | 11.7404549 |
| N | 16.0017790 | -31.8716891 | 12.8941748 |
| C | 16.7189873 | -33.1217649 | 12.6556420 |
| C | 17.3149056 | -33.7242975 | 13.9337464 |
| C | 17.9256526 | -35.1078826 | 13.7073618 |
| N | 18.6019336 | -35.6856949 | 14.8657327 |
| C | 17.7355423 | -35.9396694 | 16.0181839 |
| C | 17.6869900 | -34.8074285 | 17.0664694 |
| C | 19.0841944 | -34.2780722 | 17.3942396 |
| N | 19.0963234 | -33.4656103 | 18.6175331 |
| C | 19.8509997 | -33.7387022 | 19.6711694 |
| C | 19.7183172 | -32.8558599 | 20.9045051 |
| O | 20.5735285 | -33.4064082 | 21.8813287 |
| C | 20.3743713 | -32.9465740 | 23.1949519 |
| C | 21.3511794 | -33.7301854 | 24.0709367 |
| N | 21.4791590 | -33.4355532 | 25.3706624 |
| C | 22.3857925 | -34.2305705 | 26.2046635 |
| C | 17.7860981 | -25.9759758 | 11.2122532 |
| C | 16.3236018 | -25.5164866 | 11.1582007 |
| C | 16.0386141 | -24.4580519 | 12.2374575 |
| N | 14.6441833 | -24.1153468 | 12.4935116 |
| C | 13.8861441 | -23.6771719 | 11.3284791 |
| C | 14.4221960 | -22.4017893 | 10.6697351 |
| C | 14.4418664 | -21.2080538 | 11.6191149 |
| N | 14.9927992 | -20.0233436 | 10.9828404 |
| C | 15.0010732 | -18.8262572 | 11.6142187 |
| C | 15.5921891 | -17.6808969 | 10.7848261 |
| O | 16.0766821 | -16.6169563 | 11.5699247 |
| C | 15.0718884 | -15.7298911 | 11.9864386 |
| C | 15.6934187 | -14.5595248 | 12.7460126 |
| N | 14.8082354 | -13.6403856 | 13.2578376 |
| C | 15.3058656 | -12.5452837 | 14.0702560 |
| C | 13.9011225 | -25.0356455 | 13.3486135 |
| C | 14.5018939 | -25.2491801 | 14.7482256 |
| C | 14.9649578 | -23.9407416 | 15.4138058 |
| N | 14.7777692 | -23.8599367 | 16.8544942 |
| C | 15.3534984 | -24.6678521 | 17.7475579 |
| C | 15.1297807 | -24.3060375 | 19.2097529 |
| O | 14.5407910 | -23.0405904 | 19.3372075 |
| C | 14.3820822 | -22.6398049 | 20.6674802 |
| C | 13.8723749 | -21.1961411 | 20.7013710 |
| N | 13.7010371 | -20.6464876 | 21.9513626 |
| C | 13.2188226 | -19.2822164 | 22.0576994 |
| O | 16.0279512 | -25.6704825 | 17.4593151 |
| O | 16.0814044 | -20.2917039 | 8.1787415  |
| O | 14.2978677 | -15.4987725 | 8.5791923  |
| C | 17.4020007 | -14.9938031 | 6.7644350  |
| C | 14.6824111 | -32.0808359 | 13.4841700 |
| C | 14.0685656 | -30.8269948 | 14.1250633 |
| C | 13.0235115 | -31.1773564 | 15.1897289 |

|   |            |             |            |
|---|------------|-------------|------------|
| N | 12.3039648 | -30.0189687 | 15.7187977 |
| C | 11.1765033 | -29.6056518 | 14.8742998 |
| C | 11.0830715 | -28.1047679 | 14.5595493 |
| C | 10.5710373 | -27.2056904 | 15.6950474 |
| N | 10.4526716 | -25.8074688 | 15.3084762 |
| C | 9.4397782  | -25.3567189 | 14.5281618 |
| C | 9.4698850  | -23.8519081 | 14.2427366 |
| O | 10.6297334 | -23.2746575 | 14.7834016 |
| C | 10.7246444 | -21.8813512 | 14.7102887 |
| C | 11.8959920 | -21.4374089 | 15.6098985 |
| N | 12.2198367 | -20.1179792 | 15.6075495 |
| C | 13.3489151 | -19.6681581 | 16.4176833 |
| C | 12.0087356 | -30.1459173 | 17.1472696 |
| C | 13.2152094 | -29.8391030 | 18.0468648 |
| C | 13.5408687 | -28.3423526 | 18.0638681 |
| N | 14.8077499 | -27.9718298 | 18.6822899 |
| C | 15.0850128 | -28.1884452 | 19.9873569 |
| C | 16.3625303 | -27.5007888 | 20.4970018 |
| O | 16.0528298 | -26.4980645 | 21.4472584 |
| C | 15.6965426 | -26.9695965 | 22.7174715 |
| C | 15.2084513 | -25.7954765 | 23.5732692 |
| N | 14.8565183 | -26.1019210 | 24.8669603 |
| C | 14.4550561 | -25.0372111 | 25.7697848 |
| O | 14.3773139 | -28.8456387 | 20.7505066 |
| C | 19.4653152 | -36.8119963 | 14.4878102 |
| C | 20.8467149 | -36.3787613 | 13.9765300 |
| C | 21.7355870 | -35.8460344 | 15.1024303 |
| N | 22.9909395 | -35.2893102 | 14.6256752 |
| C | 23.4889614 | -34.0954698 | 15.0611130 |
| C | 24.8093368 | -33.6902186 | 14.3723406 |
| O | 25.4468348 | -32.6009147 | 14.9507241 |
| C | 26.0841071 | -32.8715002 | 16.1698722 |
| C | 26.8951570 | -31.6324583 | 16.5797160 |
| N | 27.6880285 | -31.7651911 | 17.6998096 |
| C | 28.4840567 | -30.6307856 | 18.1278168 |
| O | 22.9341963 | -33.3835231 | 15.8811389 |
| O | 19.9333774 | -36.3866319 | 22.4704380 |
| N | 18.6193611 | -36.2113888 | 22.4330065 |
| O | 17.9270578 | -37.0883229 | 22.8861550 |
| O | 23.3881906 | -33.9164109 | 21.1201365 |
| N | 24.0684385 | -34.4334026 | 20.1594613 |
| O | 23.7000033 | -35.6145249 | 19.8456924 |
| O | 20.6641573 | -34.6859102 | 19.6889479 |
| O | 22.0004091 | -34.6471659 | 23.5431953 |
| O | 26.8280198 | -30.5982574 | 15.9428386 |
| O | 24.9653083 | -33.8533024 | 19.6166584 |
| C | 20.6920277 | -32.4235772 | 26.0605457 |
| C | 27.8342630 | -32.9685493 | 18.4949846 |
| O | 8.5455765  | -26.0548531 | 14.0749559 |
| O | 12.4755477 | -22.2727214 | 16.2933512 |
| C | 11.6778256 | -19.1295477 | 14.6864433 |
| O | 15.1392918 | -24.6616701 | 23.1249084 |



|   |            |             |            |
|---|------------|-------------|------------|
| C | 14.9141318 | -27.4294734 | 25.4495568 |
| O | 14.5377646 | -18.6546704 | 12.7408796 |
| O | 16.9037669 | -14.4461212 | 12.8892093 |
| C | 13.3641117 | -13.7463016 | 13.1540079 |
| O | 13.6344113 | -20.5795902 | 19.6765690 |
| C | 13.9812023 | -21.3168805 | 23.2073099 |
| O | 18.2054535 | -35.1521893 | 21.9565473 |
| O | 21.3315085 | -37.3765123 | 19.9861362 |
| N | 21.1291537 | -37.5904457 | 18.6837018 |
| O | 22.0835380 | -37.9287650 | 18.0187503 |
| O | 19.9873753 | -37.4398309 | 18.2782215 |
| H | 15.2629891 | -30.1746564 | 11.9700682 |
| H | 15.5733454 | -31.4856925 | 10.8313067 |
| H | 17.8822556 | -30.2069606 | 12.3701309 |
| H | 17.9473276 | -30.9632688 | 10.7703152 |
| H | 16.5287177 | -29.0122180 | 9.8640881  |
| H | 16.5582741 | -28.3248848 | 11.4836161 |
| H | 19.1501204 | -28.3038777 | 11.3010214 |
| H | 18.9306845 | -28.7069376 | 9.5884333  |
| H | 21.2657970 | -21.7904600 | 8.9140565  |
| H | 21.7486733 | -20.5243265 | 7.7798847  |
| H | 19.2810495 | -19.8845019 | 7.5309277  |
| H | 18.8957872 | -21.0116539 | 8.8292777  |
| H | 18.6594349 | -17.2091044 | 10.9773246 |
| H | 20.4398777 | -17.2699992 | 10.8636486 |
| H | 20.3212793 | -14.8774134 | 11.5000481 |
| H | 18.5387443 | -14.9266502 | 11.4335680 |
| H | 18.8304221 | -10.3633278 | 10.9684313 |
| H | 20.6111318 | -10.5236798 | 10.9249627 |
| H | 19.6323490 | -11.0200908 | 9.5051109  |
| H | 20.6990338 | -12.6765593 | 12.8823433 |
| H | 19.2669689 | -11.6293393 | 13.0413439 |
| H | 19.0356146 | -13.3713302 | 12.8833535 |
| H | 20.4300522 | -19.4227775 | 10.2107221 |
| H | 16.7426957 | -23.1772231 | 5.0204759  |
| H | 16.8039034 | -23.0985841 | 6.7962948  |
| H | 17.9384065 | -20.8813667 | 6.6624156  |
| H | 17.8223525 | -20.9073514 | 4.8922140  |
| H | 14.1183184 | -18.9559418 | 5.8794333  |
| H | 13.4688809 | -19.6892457 | 7.3757745  |
| H | 15.4708640 | -17.0041127 | 6.1306767  |
| H | 16.4756990 | -17.4967522 | 7.5243036  |
| H | 16.8251936 | -13.0267499 | 8.5381993  |
| H | 15.8514361 | -12.7256280 | 7.0728866  |
| H | 15.0477847 | -13.3388687 | 8.5540821  |
| H | 17.2924031 | -14.6592714 | 5.7144991  |
| H | 18.2238192 | -14.4343234 | 7.2368569  |
| H | 17.6983988 | -16.0471276 | 6.7902457  |
| H | 15.5807762 | -20.3016749 | 5.0643289  |
| H | 20.1625922 | -25.9219167 | 9.9212620  |
| H | 19.6490622 | -26.9549737 | 8.5766152  |
| H | 18.0316032 | -25.2853175 | 7.8010733  |

|   |            |             |            |
|---|------------|-------------|------------|
| H | 18.3357196 | -24.2393982 | 9.1885229  |
| H | 20.6958006 | -23.9403352 | 8.5433979  |
| H | 20.4943982 | -24.9806865 | 7.1297382  |
| H | 17.1282435 | -35.7968499 | 13.3363397 |
| H | 18.6620298 | -35.0322524 | 12.8897146 |
| H | 16.5260426 | -33.7937240 | 14.6985381 |
| H | 18.0805848 | -33.0366513 | 14.3300866 |
| H | 17.5407942 | -32.9210219 | 11.9503841 |
| H | 16.0656809 | -33.8742442 | 12.1529553 |
| H | 16.4787584 | -24.7975128 | 13.1880629 |
| H | 16.5898927 | -23.5348024 | 11.9786692 |
| H | 15.6546028 | -26.3836807 | 11.2861288 |
| H | 16.1155864 | -25.1170641 | 10.1522890 |
| H | 18.4301661 | -25.0785801 | 11.2723485 |
| H | 17.9608808 | -26.5114307 | 12.1667637 |
| H | 20.3757076 | -21.4676764 | 5.9901839  |
| H | 21.5821984 | -22.6256314 | 6.5574354  |
| H | 19.2576858 | -23.0187329 | 4.9354748  |
| H | 18.6493317 | -24.4618834 | 5.7303585  |
| H | 12.3143972 | -31.9365675 | 14.7864095 |
| H | 13.5429043 | -31.6769909 | 16.0233547 |
| H | 13.6063764 | -30.1807062 | 13.3604589 |
| H | 14.8715369 | -30.2352567 | 14.5952968 |
| H | 14.7890970 | -32.8459403 | 14.2704307 |
| H | 13.9650525 | -32.5136598 | 12.7454850 |
| H | 17.0389289 | -33.9777782 | 16.7372555 |
| H | 17.2328158 | -35.2215394 | 17.9828819 |
| H | 19.7729576 | -35.1121082 | 17.5687199 |
| H | 19.4870833 | -33.6772507 | 16.5659891 |
| H | 20.0188795 | -31.8184550 | 20.6607363 |
| H | 18.6698280 | -32.8669023 | 21.2460888 |
| H | 19.3348269 | -33.1431872 | 23.5203727 |
| H | 20.5690649 | -31.8599048 | 23.2633971 |
| H | 23.0934830 | -33.5600367 | 26.7177130 |
| H | 21.8070240 | -34.7823416 | 26.9637167 |
| H | 22.9391796 | -34.9395292 | 25.5769156 |
| H | 19.9322941 | -32.8939275 | 26.7087658 |
| H | 21.3531851 | -31.8128038 | 26.6952323 |
| H | 20.1838680 | -31.7523905 | 25.3583275 |
| H | 18.4576427 | -32.6769416 | 18.6744394 |
| H | 21.3286388 | -37.2512680 | 13.4975098 |
| H | 20.7447103 | -35.6101538 | 13.1908489 |
| H | 21.2245107 | -35.0317367 | 15.6297628 |
| H | 21.9215466 | -36.6450824 | 15.8427203 |
| H | 25.4767793 | -34.5793143 | 14.3124591 |
| H | 24.5624176 | -33.4011993 | 13.3354370 |
| H | 26.7637786 | -33.7435994 | 16.0644295 |
| H | 25.3545247 | -33.1180366 | 16.9643345 |
| H | 28.2230457 | -30.3350531 | 19.1605184 |
| H | 29.5628923 | -30.8738337 | 18.1069841 |
| H | 28.2900769 | -29.7918034 | 17.4490451 |
| H | 28.8655543 | -33.3664791 | 18.4312871 |

|   |            |             |            |
|---|------------|-------------|------------|
| H | 27.6206074 | -32.7569719 | 19.5575153 |
| H | 27.1378833 | -33.7536372 | 18.1858592 |
| H | 23.5709087 | -35.8621306 | 14.0222697 |
| H | 18.1153189 | -36.8315734 | 16.5371160 |
| H | 16.6968026 | -36.1813388 | 15.7051288 |
| H | 19.6155249 | -37.4445621 | 15.3759991 |
| H | 18.9747138 | -37.4548965 | 13.7242090 |
| H | 12.0729955 | -27.7508030 | 14.2257225 |
| H | 10.3853712 | -27.9792216 | 13.7145411 |
| H | 9.5777181  | -27.5653318 | 16.0153101 |
| H | 11.2384461 | -27.2466519 | 16.5677183 |
| H | 9.4025462  | -23.7187798 | 13.1443769 |
| H | 8.5500548  | -23.4114359 | 14.6789800 |
| H | 9.7890150  | -21.3976610 | 15.0608792 |
| H | 10.8878149 | -21.5519017 | 13.6648434 |
| H | 13.1275894 | -18.6641592 | 16.8126443 |
| H | 13.5044975 | -20.3467959 | 17.2647445 |
| H | 14.2657040 | -19.6025916 | 15.8054480 |
| H | 11.4249135 | -18.2094527 | 15.2405549 |
| H | 12.4203801 | -18.8740706 | 13.9096339 |
| H | 10.7580386 | -19.4823220 | 14.2046071 |
| H | 11.1167554 | -25.1136206 | 15.6428149 |
| H | 13.0132360 | -30.1786270 | 19.0737292 |
| H | 14.0985795 | -30.3999431 | 17.6957297 |
| H | 13.5797670 | -27.9793424 | 17.0263453 |
| H | 12.7141936 | -27.8100020 | 18.5731707 |
| H | 17.0260363 | -28.2734464 | 20.9359745 |
| H | 16.8931922 | -26.9952408 | 19.6772895 |
| H | 16.5698241 | -27.4456529 | 23.2157491 |
| H | 14.9073710 | -27.7389601 | 22.6439894 |
| H | 13.4229237 | -25.1949401 | 26.1307481 |
| H | 15.1228232 | -24.9972876 | 26.6494024 |
| H | 14.5063528 | -24.0809625 | 25.2373632 |
| H | 15.7878724 | -27.5503264 | 26.1188625 |
| H | 14.0074885 | -27.6108084 | 26.0515951 |
| H | 14.9538358 | -28.2098391 | 24.6811404 |
| H | 15.3755349 | -27.2741252 | 18.1836593 |
| H | 10.2109633 | -29.9595044 | 15.2973920 |
| H | 11.2727422 | -30.1257531 | 13.9077219 |
| H | 11.1937761 | -29.4486941 | 17.4001103 |
| H | 11.6169025 | -31.1591690 | 17.3911084 |
| H | 15.4339223 | -22.5670717 | 10.2602086 |
| H | 13.7841703 | -22.1731588 | 9.7977583  |
| H | 13.4175920 | -20.9918008 | 11.9749808 |
| H | 15.0208778 | -21.4585752 | 12.5245644 |
| H | 16.4354373 | -18.0557837 | 10.1845249 |
| H | 14.8213002 | -17.3396767 | 10.0700700 |
| H | 14.3496268 | -16.2458559 | 12.6438161 |
| H | 14.5186711 | -15.3432619 | 11.1059161 |
| H | 14.9942429 | -11.5724294 | 13.6497763 |
| H | 14.9181390 | -12.6106279 | 15.1035743 |
| H | 16.4002453 | -12.5942529 | 14.0973895 |

|    |            |             |            |
|----|------------|-------------|------------|
| H  | 12.9099470 | -14.1626891 | 14.0738584 |
| H  | 12.9334985 | -12.7437962 | 12.9926157 |
| H  | 13.0626972 | -14.3698394 | 12.3045344 |
| H  | 15.3842548 | -20.0946350 | 10.0391573 |
| H  | 13.7142414 | -25.7102579 | 15.3662869 |
| H  | 15.3282322 | -25.9771560 | 14.7364233 |
| H  | 16.0291813 | -23.7626228 | 15.1825414 |
| H  | 14.4021527 | -23.1002571 | 14.9934395 |
| H  | 14.5137128 | -25.0987577 | 19.6802675 |
| H  | 16.1115917 | -24.3570067 | 19.7183705 |
| H  | 15.3385547 | -22.7210029 | 21.2194070 |
| H  | 13.6777507 | -23.3053982 | 21.2063575 |
| H  | 12.2813259 | -19.2418136 | 22.6417394 |
| H  | 13.9622333 | -18.6384121 | 22.5629205 |
| H  | 13.0347377 | -18.8970351 | 21.0479797 |
| H  | 14.7581247 | -20.7705976 | 23.7748606 |
| H  | 13.0738387 | -21.3482458 | 23.8393167 |
| H  | 14.3294954 | -22.3469305 | 23.0661911 |
| H  | 14.1768273 | -23.1078855 | 17.1963930 |
| H  | 12.8539763 | -23.4851944 | 11.6683672 |
| H  | 13.8007664 | -24.4710870 | 10.5515686 |
| H  | 12.8972391 | -24.5981081 | 13.4795779 |
| H  | 13.7398429 | -26.0323798 | 12.8740384 |
| Np | 21.8472557 | -35.7817229 | 21.4311413 |
| N  | 24.2278188 | -37.3147566 | 23.3542824 |
| O  | 24.8784898 | -38.3079831 | 23.1513205 |
| O  | 23.1718032 | -37.1174208 | 22.5309347 |
| O  | 24.4179359 | -36.4798929 | 24.2187392 |

**[L<sub>T</sub>-Pu(NO<sub>3</sub>)<sub>4</sub>] (all nitrate monodentate)**

|   |            |            |            |
|---|------------|------------|------------|
| C | -3.7807437 | -1.5799775 | -2.4638566 |
| H | -4.3685101 | -2.4850004 | -2.6900589 |
| H | -4.4336403 | -0.6982335 | -2.5796667 |
| H | -2.9382357 | -1.5073294 | -3.1635985 |
| C | -1.4490692 | -1.6993731 | 0.5726954  |
| H | -1.8780593 | -0.9211490 | 1.2293626  |
| H | -1.7112076 | -2.7060060 | 0.9435029  |
| C | 0.7059774  | -1.6685354 | 1.6526598  |
| H | 0.4495765  | -0.8734216 | 2.3760530  |
| H | 0.5773634  | -2.6657733 | 2.1130967  |
| C | 4.5303895  | -1.5654292 | 1.7864351  |
| C | 5.0558475  | -2.8885486 | 1.2188836  |
| H | 5.0857745  | -1.2600675 | 2.6876582  |
| H | 4.6455669  | -0.7663834 | 1.0384502  |
| C | 6.4715428  | -2.7465064 | 0.6232722  |
| H | 5.0387171  | -3.6646958 | 2.0047536  |
| H | 4.3530800  | -3.2176318 | 0.4375023  |
| H | 6.4637185  | -1.9156705 | -0.1036006 |
| H | 7.1777425  | -2.4361582 | 1.4122861  |
| C | 7.5508861  | -4.9312077 | 0.9116139  |
| C | 8.9976204  | -4.6505068 | 1.3383694  |
| H | 7.5216190  | -5.9181790 | 0.4210890  |

|   |            |             |            |
|---|------------|-------------|------------|
| H | 6.9156927  | -5.0386293  | 1.8181062  |
| C | 9.5196970  | -5.6549006  | 2.3695410  |
| H | 9.6315785  | -4.6598693  | 0.4337900  |
| H | 9.0733229  | -3.6269017  | 1.7474866  |
| C | 11.0091125 | -5.4841970  | 2.6856219  |
| H | 8.9299858  | -5.5619709  | 3.2990593  |
| H | 9.3607983  | -6.6893900  | 2.0163380  |
| H | 11.5754136 | -5.6313870  | 1.7517217  |
| H | 11.2037571 | -4.4285128  | 2.9912252  |
| C | 12.9064257 | -6.8059590  | 3.5081380  |
| C | 13.1368583 | -7.8076738  | 2.3709427  |
| H | 13.5635396 | -5.9159617  | 3.3570942  |
| H | 13.2506560 | -7.2737949  | 4.4438750  |
| C | 14.6113776 | -8.2042290  | 2.2312579  |
| H | 12.5284229 | -8.7085109  | 2.5550705  |
| H | 12.7831553 | -7.3822295  | 1.4142880  |
| H | 15.2359710 | -7.3040114  | 2.0822136  |
| H | 14.9680018 | -8.6996271  | 3.1467435  |
| C | 15.3727068 | -11.2801363 | 0.0853891  |
| H | 14.6975533 | -12.1511475 | 0.2191831  |
| H | 15.0212719 | -10.7280898 | -0.8140463 |
| C | 16.8865760 | -12.6640205 | -1.0321303 |
| H | 16.5131337 | -12.3244873 | -2.0241990 |
| H | 16.3165529 | -13.5840279 | -0.7804326 |
| C | 20.1113341 | -14.4084422 | -2.1180329 |
| H | 20.4673687 | -14.3441269 | -3.1619660 |
| H | 20.7125958 | -13.7431835 | -1.4872084 |
| H | 20.2452981 | -15.4510015 | -1.7743898 |
| N | -3.2818683 | -1.6580012  | -1.0918461 |
| N | 18.7201689 | -14.0022530 | -2.0219509 |
| C | -4.2629056 | -1.9652271  | -0.0639116 |
| H | -5.1613204 | -1.3475815  | -0.2221399 |
| H | -4.5628677 | -3.0274810  | -0.1031484 |
| H | -3.8830658 | -1.7426900  | 0.9400862  |
| C | 17.7749539 | -14.8030359 | -2.7735586 |
| H | 18.1440050 | -14.9500892 | -3.8035350 |
| H | 17.6303711 | -15.8065979 | -2.3272707 |
| H | 16.7940421 | -14.3184753 | -2.8476638 |
| C | 18.3852828 | -12.9907054 | -1.1447288 |
| C | -1.9699690 | -1.5191269  | -0.8518961 |
| O | -1.1702132 | -1.2545316  | -1.7622143 |
| O | 19.2118420 | -12.3787916 | -0.4994499 |
| O | -0.0544829 | -1.5520841  | 0.4779549  |
| O | 16.7062287 | -11.6841337 | -0.0586705 |
| C | 15.2511553 | -10.4328054 | 1.3586635  |
| C | 2.1548293  | -1.5051941  | 1.2082608  |
| O | 2.4274420  | -1.2773746  | 0.0238008  |
| O | 15.4793289 | -10.9040521 | 2.4557831  |
| N | 3.1102269  | -1.6223062  | 2.1374132  |
| H | 2.8428421  | -1.8690979  | 3.0836794  |
| N | 14.8484520 | -9.1433795  | 1.1491579  |
| H | 14.7131565 | -8.8252146  | 0.1971241  |

|   |            |             |            |
|---|------------|-------------|------------|
| N | 7.0179905  | -3.9392095  | -0.0192440 |
| N | 11.5090445 | -6.4245449  | 3.6812490  |
| C | 11.1098035 | -6.1181818  | 5.0568086  |
| C | 10.1992986 | -7.1704594  | 5.7054912  |
| H | 12.0085249 | -5.9802904  | 5.6899677  |
| H | 10.5868966 | -5.1446805  | 5.0806393  |
| C | 10.8404333 | -8.5585668  | 5.8181246  |
| H | 9.9158397  | -6.8143640  | 6.7136181  |
| H | 9.2667924  | -7.2605148  | 5.1236721  |
| H | 11.0478858 | -8.9512784  | 4.8126049  |
| H | 11.8016870 | -8.4876398  | 6.3596912  |
| C | 8.4902026  | -11.4158235 | 6.7378477  |
| H | 7.4689221  | -11.4584072 | 6.3091199  |
| H | 8.9108504  | -12.4406632 | 6.6784906  |
| C | 7.8786015  | -11.7179536 | 9.0157979  |
| H | 8.2971730  | -12.7472767 | 9.0191644  |
| H | 6.7896878  | -11.8165754 | 8.8203327  |
| C | 7.7803916  | -11.1273687 | 12.7984964 |
| H | 8.3586275  | -11.8319921 | 13.4241242 |
| H | 8.3460508  | -10.1943468 | 12.6926938 |
| H | 6.8235786  | -10.9207130 | 13.3098294 |
| N | 7.5444805  | -11.6791515 | 11.4748464 |
| C | 6.8138982  | -12.9306582 | 11.4349035 |
| H | 7.4026368  | -13.7619981 | 11.8682263 |
| H | 5.8817607  | -12.8450501 | 12.0204734 |
| H | 6.5337364  | -13.2092636 | 10.4125291 |
| C | 8.1134280  | -11.0581657 | 10.3875508 |
| O | 8.7729078  | -10.0393916 | 10.4769877 |
| O | 8.4950334  | -10.9246104 | 8.0532637  |
| C | 9.3379429  | -10.5163854 | 5.8312869  |
| N | 9.9947073  | -9.5278377  | 6.4866860  |
| H | 9.8251424  | -9.4568947  | 7.4873087  |
| C | 6.2154324  | -4.4901783  | -1.1056089 |
| C | 5.9633689  | -3.4982437  | -2.2457662 |
| H | 6.7617502  | -5.3607823  | -1.5077364 |
| H | 5.2328948  | -4.8854531  | -0.7581989 |
| C | 5.0799095  | -4.1139835  | -3.3376010 |
| H | 5.4511775  | -2.5986765  | -1.8739662 |
| H | 6.9282541  | -3.1646578  | -2.6651802 |
| H | 5.6035642  | -4.9238833  | -3.8701566 |
| H | 4.1772910  | -4.5464929  | -2.8795419 |
| C | 3.1979200  | -1.3587415  | -5.2129030 |
| H | 4.0911285  | -0.9234621  | -5.6994813 |
| H | 2.5939498  | -1.9224325  | -5.9482283 |
| C | 1.9190108  | 0.6745182   | -5.3903155 |
| H | 1.4487626  | 0.2870133   | -6.3140887 |
| H | 2.7267497  | 1.3829884   | -5.6403542 |
| C | -0.5615061 | 3.2474517   | -4.0015421 |
| H | -0.1743702 | 4.2466330   | -3.7436203 |
| H | -1.5324416 | 3.3623964   | -4.5122475 |
| H | -0.6952718 | 2.6632474   | -3.0837903 |
| N | 0.3942971  | 2.5661432   | -4.8716411 |

|    |            |             |            |
|----|------------|-------------|------------|
| C  | 0.8722902  | 3.3138718   | -6.0247751 |
| H  | 0.0255731  | 3.8464104   | -6.4851628 |
| H  | 1.6345857  | 4.0571580   | -5.7324135 |
| H  | 1.2961761  | 2.6514192   | -6.7890760 |
| C  | 0.8454904  | 1.3487129   | -4.5344883 |
| O  | 0.3953523  | 0.7380547   | -3.5525165 |
| O  | 2.4147915  | -0.3712240  | -4.5985403 |
| C  | 3.6190412  | -2.3013187  | -4.0958023 |
| O  | 3.0129981  | -2.3149939  | -3.0178554 |
| N  | 4.6298983  | -3.1468044  | -4.3390184 |
| H  | 5.1680084  | -3.0286194  | -5.1896989 |
| N  | 0.5531378  | -3.9936461  | -0.5734619 |
| O  | 1.3102236  | -4.3438478  | 0.3294232  |
| O  | 1.0483307  | -3.2538593  | -1.5216319 |
| O  | -0.6283194 | -4.3137704  | -0.6338604 |
| N  | 0.0273987  | 1.1602352   | 0.2961921  |
| O  | 0.8252836  | 1.2786189   | 1.2216790  |
| O  | 0.4901959  | 0.8813523   | -0.8863060 |
| O  | -1.1859839 | 1.3095927   | 0.4221129  |
| N  | 3.9373645  | 0.8454860   | -2.8292574 |
| O  | 3.7295053  | 1.9401009   | -3.3387773 |
| O  | 4.9530824  | 0.1837058   | -3.0149435 |
| O  | 3.0282163  | 0.3630944   | -2.0303372 |
| N  | -0.3234041 | -1.7447148  | -5.0459187 |
| O  | 0.2775604  | -1.8756152  | -6.1184552 |
| O  | 0.3031974  | -2.0952968  | -3.9640894 |
| O  | -1.4697389 | -1.3222727  | -4.9767873 |
| O  | 9.3926409  | -10.7334333 | 4.6314403  |
| Pu | 1.1802765  | -1.0077048  | -2.0623932 |

**[L<sub>T</sub>-Pu(NO<sub>3</sub>)<sub>4</sub>] (two monodentate and two bidentate nitrate)**

|   |            |            |            |
|---|------------|------------|------------|
| C | -4.6938157 | 0.5953853  | -3.0817371 |
| H | -5.3041960 | -0.1295576 | -3.6435336 |
| H | -5.2338495 | 1.5558603  | -3.0380177 |
| H | -3.7348390 | 0.7385354  | -3.5914305 |
| C | -2.9627512 | -0.5742948 | 0.1318105  |
| H | -3.4210320 | 0.0816691  | 0.8925974  |
| H | -3.3849014 | -1.5932565 | 0.1985432  |
| C | -1.0770667 | -0.9975719 | 1.5533162  |
| H | -1.4202311 | -0.2950570 | 2.3371973  |
| H | -1.3931396 | -2.0249400 | 1.8077556  |
| C | 2.6522789  | -1.5195753 | 2.2956547  |
| C | 3.2285645  | -2.7212967 | 1.5358043  |
| H | 3.0356690  | -1.4761378 | 3.3276666  |
| H | 2.9426191  | -0.5840301 | 1.7960042  |
| C | 4.6961124  | -2.4640129 | 1.1195868  |
| H | 3.1592063  | -3.6311705 | 2.1583286  |
| H | 2.6135302  | -2.9015744 | 0.6392287  |
| H | 4.7068141  | -1.6020136 | 0.4270605  |
| H | 5.2749443  | -2.1432739 | 2.0043604  |
| C | 5.9598987  | -4.5561832 | 1.4198868  |

|   |            |             |            |
|---|------------|-------------|------------|
| C | 7.3928774  | -4.2080973  | 1.8473006  |
| H | 5.9662117  | -5.5443854  | 0.9313116  |
| H | 5.3256675  | -4.6846087  | 2.3240709  |
| C | 8.0464820  | -5.2420061  | 2.7672569  |
| H | 7.9969473  | -4.0836343  | 0.9316810  |
| H | 7.3921581  | -3.2188746  | 2.3407803  |
| C | 9.4863502  | -4.8666819  | 3.1338289  |
| H | 7.4408589  | -5.3620801  | 3.6846162  |
| H | 8.0624312  | -6.2336759  | 2.2811536  |
| H | 10.0520293 | -4.7564260  | 2.1960643  |
| H | 9.4976329  | -3.8578437  | 3.6095935  |
| C | 11.6176252 | -5.8734161  | 3.7708800  |
| C | 12.0582718 | -6.5083534  | 2.4480613  |
| H | 12.0490309 | -4.8461243  | 3.8502249  |
| H | 12.0718700 | -6.4468375  | 4.5933252  |
| C | 13.5854404 | -6.5375082  | 2.2987777  |
| H | 11.6626558 | -7.5353150  | 2.3858565  |
| H | 11.6293389 | -5.9520431  | 1.5963258  |
| H | 14.0039784 | -5.5329247  | 2.4903636  |
| H | 14.0215946 | -7.2270535  | 3.0371526  |
| C | 14.9136798 | -8.5367376  | -0.6771177 |
| H | 14.7491259 | -7.6586170  | -1.3387913 |
| H | 16.0126272 | -8.6818248  | -0.5990040 |
| C | 14.9223294 | -10.2270472 | -2.2911807 |
| H | 15.9445043 | -10.5696142 | -2.0247439 |
| H | 15.0415206 | -9.4809991  | -3.1087727 |
| C | 13.9342009 | -13.3074748 | -4.3334044 |
| H | 14.5175351 | -14.2346305 | -4.1844424 |
| H | 12.9839194 | -13.3870941 | -3.7920666 |
| H | 13.7302733 | -13.2031829 | -5.4149770 |
| N | -4.4573439 | 0.0864023   | -1.7311693 |
| N | 14.6573691 | -12.1549243 | -3.8277003 |
| C | -5.6425518 | -0.3169397  | -0.9885221 |
| H | -6.3673157 | 0.5135661   | -0.9665321 |
| H | -6.1243294 | -1.1839160  | -1.4714203 |
| H | -5.4046737 | -0.5826797  | 0.0472632  |
| C | 15.9595751 | -11.9241161 | -4.4174998 |
| H | 16.6690623 | -12.7372222 | -4.1703174 |
| H | 15.8805141 | -11.8792630 | -5.5192408 |
| H | 16.4002973 | -10.9784077 | -4.0828786 |
| C | 14.0869292 | -11.4064059 | -2.8172904 |
| C | -3.2075944 | 0.0050891   | -1.2579122 |
| O | -2.2341548 | 0.3929980   | -1.9288704 |
| O | 12.9855709 | -11.6454544 | -2.3659614 |
| O | -1.5661122 | -0.6105167  | 0.2920496  |
| O | 14.2822612 | -9.6772449  | -1.1831115 |
| C | 14.4125392 | -8.2786777  | 0.7503329  |
| C | 0.4398319  | -0.9239296  | 1.4347960  |
| O | 0.9467455  | -0.2784719  | 0.5010861  |
| O | 14.4223860 | -9.1486651  | 1.5971710  |
| N | 1.1865126  | -1.5144604  | 2.3655557  |
| H | 0.7265422  | -2.1068956  | 3.0491121  |



|   |            |             |            |
|---|------------|-------------|------------|
| N | 14.0379357 | -6.9853751  | 0.9929569  |
| H | 13.9439418 | -6.3517115  | 0.2079491  |
| N | 5.3957031  | -3.5734726  | 0.5026525  |
| N | 10.1680803 | -5.8555848  | 3.9669715  |
| C | 9.7588103  | -5.8048027  | 5.3711341  |
| C | 9.4605276  | -7.1664513  | 6.0154758  |
| H | 10.5068345 | -5.2586796  | 5.9874832  |
| H | 8.8356962  | -5.2085371  | 5.4395144  |
| C | 10.6742844 | -8.0554015  | 6.2817814  |
| H | 8.9549690  | -6.9686765  | 6.9814934  |
| H | 8.7405973  | -7.7103808  | 5.3807301  |
| H | 11.1616004 | -8.3712713  | 5.3472753  |
| H | 11.4363774 | -7.4924493  | 6.8569316  |
| C | 10.5165447 | -11.5608189 | 7.8008167  |
| H | 9.5360437  | -11.3162727 | 8.2662306  |
| H | 10.3369480 | -12.3826177 | 7.0760080  |
| C | 11.1829397 | -13.1520680 | 9.3765557  |
| H | 11.1664907 | -13.9724347 | 8.6272514  |
| H | 10.1814803 | -13.1491071 | 9.8621960  |
| C | 13.1829073 | -14.9979964 | 12.0656826 |
| H | 13.7442784 | -15.8970260 | 11.7507111 |
| H | 13.8774268 | -14.1549460 | 12.1605616 |
| H | 12.7259449 | -15.2078007 | 13.0497922 |
| N | 12.1671292 | -14.6515481 | 11.0873841 |
| C | 11.1722053 | -15.6722157 | 10.8286551 |
| H | 11.6191796 | -16.5663246 | 10.3529404 |
| H | 10.7047703 | -16.0009436 | 11.7747094 |
| H | 10.3705290 | -15.3080295 | 10.1763476 |
| C | 12.2572090 | -13.4353609 | 10.4407088 |
| O | 13.1240669 | -12.6223243 | 10.6884875 |
| O | 11.4584468 | -11.9295577 | 8.7689284  |
| C | 11.0769168 | -10.3810510 | 6.9953488  |
| N | 10.2901852 | -9.2635469  | 6.9929564  |
| H | 9.5213594  | -9.2061539  | 7.6507824  |
| C | 4.8360836  | -4.0643303  | -0.7481084 |
| C | 5.8751908  | -4.6901312  | -1.6856723 |
| H | 4.0104043  | -4.7977861  | -0.5897656 |
| H | 4.3760425  | -3.2039092  | -1.2640682 |
| C | 5.2682552  | -5.0885531  | -3.0383648 |
| H | 6.6978884  | -3.9749721  | -1.8483441 |
| H | 6.3184374  | -5.5868696  | -1.2170250 |
| H | 4.3405004  | -5.6669342  | -2.8817036 |
| H | 5.0000615  | -4.1856113  | -3.6078329 |
| C | 7.8718939  | -6.3070526  | -5.5465725 |
| H | 8.7993437  | -6.4178652  | -4.9547222 |
| H | 7.3790480  | -7.3024931  | -5.5888250 |
| C | 8.7027474  | -6.7592313  | -7.7210159 |
| H | 8.6281012  | -6.3096454  | -8.7252324 |
| H | 8.1158641  | -7.7043173  | -7.7411628 |
| C | 12.2193097 | -8.2641464  | -8.0568397 |
| H | 12.3265848 | -9.3569516  | -7.9276241 |
| H | 12.8653993 | -7.9537454  | -8.8977727 |

|    |            |             |             |
|----|------------|-------------|-------------|
| H  | 12.5465326 | -7.7585809  | -7.1406908  |
| N  | 10.8352632 | -7.9057519  | -8.3131431  |
| C  | 10.2466542 | -8.4905920  | -9.5018684  |
| H  | 10.8395175 | -8.2316969  | -10.3980795 |
| H  | 10.2187203 | -9.5944477  | -9.4308426  |
| H  | 9.2225622  | -8.1395039  | -9.6681645  |
| C  | 10.1790105 | -7.0936432  | -7.4164194  |
| O  | 10.7188766 | -6.6547506  | -6.4143706  |
| O  | 8.1521692  | -5.8365190  | -6.8393346  |
| C  | 6.9523935  | -5.3024516  | -4.8426735  |
| O  | 6.9492474  | -4.1158170  | -5.0968407  |
| N  | 6.1575613  | -5.8699412  | -3.8804951  |
| H  | 6.2308801  | -6.8659657  | -3.7100079  |
| N  | -0.7616353 | -2.6825650  | -1.2465009  |
| O  | -0.2787829 | -3.2628841  | -0.2799969  |
| O  | -0.0243753 | -1.7675302  | -1.8342930  |
| O  | -1.8779612 | -2.8954807  | -1.6924528  |
| N  | -0.9009258 | 2.4219798   | 0.9892810   |
| O  | -0.0877275 | 2.9916351   | 1.6793898   |
| O  | -0.5605775 | 2.1493295   | -0.2652062  |
| O  | -2.0227175 | 2.0757610   | 1.3468608   |
| N  | 2.4114164  | 2.1779488   | -1.9515728  |
| O  | 3.3745641  | 2.8725096   | -2.0755055  |
| O  | 2.3943759  | 1.1283989   | -1.2095170  |
| O  | 1.2959285  | 2.4043727   | -2.5359631  |
| N  | 0.5620166  | 0.2493835   | -4.4175106  |
| O  | 1.3998158  | -0.1702055  | -3.5489785  |
| O  | -0.4947719 | 0.7701484   | -3.9007042  |
| O  | 0.7336418  | 0.1628142   | -5.5966467  |
| O  | 12.1185468 | -10.4680125 | 6.3767774   |
| Pu | 0.1221549  | 0.5042433   | -1.6058707  |

**[L<sub>II</sub>-Pu(NO<sub>3</sub>)<sub>4</sub>] (all nitrate monodentate)**

|   |            |             |            |
|---|------------|-------------|------------|
| C | 18.8269732 | -10.2769040 | 8.8525739  |
| N | 18.9157787 | -11.5483638 | 9.5481800  |
| C | 19.2193513 | -11.5067454 | 10.9703339 |
| C | 18.7720484 | -12.7114035 | 8.8325542  |
| C | 19.0016641 | -14.0037507 | 9.6183206  |
| O | 19.0295112 | -15.0923418 | 8.7329811  |
| C | 19.2140286 | -16.3057474 | 9.3959707  |
| C | 19.0168136 | -17.4613888 | 8.4164623  |
| O | 18.1964617 | -17.4153952 | 7.5114256  |
| O | 18.4799712 | -12.7202825 | 7.6446850  |
| N | 19.7792919 | -18.5672677 | 8.6665687  |
| C | 19.5227893 | -19.8152774 | 7.9651757  |
| C | 20.7630363 | -20.5791311 | 7.4967249  |
| C | 20.4154497 | -21.6353357 | 6.4290712  |
| N | 19.4311422 | -22.6361689 | 6.8486882  |
| C | 18.5022203 | -23.0992720 | 5.8103900  |
| C | 17.0326780 | -22.6863889 | 6.0289488  |
| C | 16.8746621 | -21.1655336 | 6.0032822  |
| N | 15.5390453 | -20.6326880 | 6.2335276  |

|   |            |             |            |
|---|------------|-------------|------------|
| C | 15.1712286 | -20.0426973 | 7.4009803  |
| C | 13.8313251 | -19.2808533 | 7.3584329  |
| O | 13.9253799 | -17.9832666 | 7.8636898  |
| C | 14.7896718 | -17.1277916 | 7.1458847  |
| C | 14.5313918 | -15.6772564 | 7.5886781  |
| N | 15.2923467 | -14.7224149 | 6.9847893  |
| C | 15.0112832 | -13.3191394 | 7.2453727  |
| C | 20.0095674 | -23.7099982 | 7.6519417  |
| C | 19.0072684 | -24.4024085 | 8.5760032  |
| C | 19.6349234 | -25.5234433 | 9.4122247  |
| N | 18.7120472 | -26.0623505 | 10.4015826 |
| C | 18.9954601 | -27.4219525 | 10.8485945 |
| C | 17.7526340 | -28.1255197 | 11.4046322 |
| C | 18.0180974 | -29.4674996 | 12.0916387 |
| C | 16.7026571 | -30.1161459 | 12.5541102 |
| N | 16.8329769 | -31.0387297 | 13.6785347 |
| C | 17.5806641 | -32.2410274 | 13.3222421 |
| C | 18.1403657 | -33.0307160 | 14.5121720 |
| C | 19.0008644 | -34.2018941 | 14.0324197 |
| N | 19.6561413 | -34.9823621 | 15.0822072 |
| C | 18.7184155 | -35.6621120 | 15.9831358 |
| C | 18.4001150 | -34.9225378 | 17.2928519 |
| C | 19.6542935 | -34.4066923 | 18.0127039 |
| N | 19.4344432 | -34.2923583 | 19.4539302 |
| C | 20.1836410 | -34.9361235 | 20.3559797 |
| C | 19.6412243 | -35.0346949 | 21.7756295 |
| O | 20.7377636 | -35.4524309 | 22.5447602 |
| C | 20.7415398 | -35.2105455 | 23.9308946 |
| C | 22.1966087 | -35.4231909 | 24.3439853 |
| N | 22.5657686 | -35.2352788 | 25.6210740 |
| C | 23.9552353 | -35.4874788 | 26.0043227 |
| C | 18.4175325 | -25.1310346 | 11.4944566 |
| C | 16.9436327 | -24.7367508 | 11.6471573 |
| C | 16.7724382 | -23.6315429 | 12.7070025 |
| N | 15.4505387 | -23.4662642 | 13.2990826 |
| C | 14.3863504 | -23.1162786 | 12.3626292 |
| C | 14.6608847 | -21.8928685 | 11.4829108 |
| C | 14.9597774 | -20.6134396 | 12.2592766 |
| N | 15.2422945 | -19.5050660 | 11.3591722 |
| C | 15.1958964 | -18.2164575 | 11.7696311 |
| C | 15.4957196 | -17.1940116 | 10.6663904 |
| O | 15.9832449 | -15.9700548 | 11.1638953 |
| C | 14.9700682 | -15.1074502 | 11.6120400 |
| C | 15.5810625 | -13.7919642 | 12.0890775 |
| N | 14.6963549 | -12.8713267 | 12.5989514 |
| C | 15.2005805 | -11.6354506 | 13.1691407 |
| C | 15.0158042 | -24.5381706 | 14.1954484 |
| C | 15.9836067 | -24.8795493 | 15.3324983 |
| C | 16.2872984 | -23.7312234 | 16.3087516 |
| N | 15.2183852 | -23.4492931 | 17.2568486 |
| C | 15.0656861 | -24.1683123 | 18.3742579 |
| C | 13.9283630 | -23.7729735 | 19.3055654 |

|   |            |             |            |
|---|------------|-------------|------------|
| O | 13.3442824 | -22.5477283 | 18.9475400 |
| C | 12.4187374 | -22.1091732 | 19.9012690 |
| C | 11.8636027 | -20.7390635 | 19.5029203 |
| N | 11.0585821 | -20.1261896 | 20.4354973 |
| C | 10.4480143 | -18.8510713 | 20.1077512 |
| O | 15.7871177 | -25.1336020 | 18.6753467 |
| O | 15.8536520 | -20.0833943 | 8.4201881  |
| O | 13.6701427 | -15.4269737 | 8.4252745  |
| C | 16.3917346 | -14.9813858 | 6.0625671  |
| C | 15.5498612 | -31.3483775 | 14.3064572 |
| C | 14.7958916 | -30.1448699 | 14.8891042 |
| C | 13.6983810 | -30.5894046 | 15.8634467 |
| N | 12.7690117 | -29.5281373 | 16.2496447 |
| C | 11.7927482 | -29.2040311 | 15.1989855 |
| C | 11.6911851 | -27.7186982 | 14.8147374 |
| C | 10.9774974 | -26.8226214 | 15.8374490 |
| N | 10.8806520 | -25.4304575 | 15.4300246 |
| C | 9.8708084  | -24.9687197 | 14.6519586 |
| C | 9.9175703  | -23.4625584 | 14.3715851 |
| O | 11.1419236 | -22.9199740 | 14.7939015 |
| C | 11.2165702 | -21.5235389 | 14.8407229 |
| C | 12.6126843 | -21.1416098 | 15.3627364 |
| N | 12.9264829 | -19.8237647 | 15.3988686 |
| C | 14.2008059 | -19.3951933 | 15.9632901 |
| C | 12.1988981 | -29.7479823 | 17.5829723 |
| C | 13.1227252 | -29.3113764 | 18.7294625 |
| C | 13.2570628 | -27.7871762 | 18.7863116 |
| N | 14.2337378 | -27.2655832 | 19.7283504 |
| C | 14.0004917 | -27.2353763 | 21.0603987 |
| C | 14.9889238 | -26.3781407 | 21.8646584 |
| O | 14.3388246 | -25.2268094 | 22.3773244 |
| C | 13.5444329 | -25.4554963 | 23.5081623 |
| C | 12.7521370 | -24.1880162 | 23.8414228 |
| N | 12.0530655 | -24.2168850 | 25.0240792 |
| C | 11.3728419 | -23.0173163 | 25.4806957 |
| O | 13.0471354 | -27.7899363 | 21.6054105 |
| C | 20.6858770 | -35.8555003 | 14.5191288 |
| C | 21.8301187 | -36.2862349 | 15.4554640 |
| C | 21.5819134 | -37.5000333 | 16.3659750 |
| N | 22.8371985 | -38.0148805 | 16.9068648 |
| C | 23.1802495 | -38.0132538 | 18.2043288 |
| C | 24.6341453 | -38.3702333 | 18.5115600 |
| O | 24.8247185 | -38.8105668 | 19.8236542 |
| C | 24.6609651 | -40.1780639 | 20.0950049 |
| C | 23.2985545 | -40.4899545 | 20.7311332 |
| N | 22.9467720 | -41.7756493 | 20.9072015 |
| C | 21.6461454 | -42.0941617 | 21.4988204 |
| O | 22.3954060 | -37.6988121 | 19.1034550 |
| O | 21.4501279 | -38.1249976 | 23.3917173 |
| N | 20.2917018 | -38.7083301 | 23.6368488 |
| O | 20.2233886 | -39.9186497 | 23.5550209 |
| O | 23.8433924 | -33.7465682 | 20.0739494 |

|   |            |             |            |
|---|------------|-------------|------------|
| N | 23.9972179 | -34.8851663 | 19.6888824 |
| O | 23.9759015 | -35.8525578 | 20.5949380 |
| O | 21.2769416 | -35.4520718 | 20.0958979 |
| O | 23.0026146 | -35.7737628 | 23.4702413 |
| O | 22.5542709 | -39.5677901 | 21.0879783 |
| O | 24.2027348 | -35.2135328 | 18.5245239 |
| C | 21.6752293 | -34.7535715 | 26.6635954 |
| C | 23.7652152 | -42.8997636 | 20.4815432 |
| O | 8.9554777  | -25.6514265 | 14.2183383 |
| O | 13.3865153 | -22.0326669 | 15.6951479 |
| C | 12.0247650 | -18.7403738 | 15.0530092 |
| O | 12.7441884 | -23.2165504 | 23.0988460 |
| C | 12.0066178 | -25.3579091 | 25.9213899 |
| O | 14.9006587 | -17.8762970 | 12.9147784 |
| O | 16.7835503 | -13.5710812 | 12.0238670 |
| C | 13.2682899 | -13.0942835 | 12.7344718 |
| O | 12.1119670 | -20.2339047 | 18.4187175 |
| C | 10.6630598 | -20.7024005 | 21.7085767 |
| O | 19.3595698 | -37.9854053 | 23.9780073 |
| O | 20.2760342 | -37.9042128 | 20.9475335 |
| N | 19.7448019 | -38.2524149 | 19.8039877 |
| O | 19.9539485 | -39.3679270 | 19.3648007 |
| O | 19.0302433 | -37.4167930 | 19.2419884 |
| H | 16.0341952 | -29.3044316 | 12.8733996 |
| H | 16.1973733 | -30.5983847 | 11.6819425 |
| H | 18.6544727 | -29.3097191 | 12.9801203 |
| H | 18.5787147 | -30.1359779 | 11.4142696 |
| H | 17.0238323 | -28.2464681 | 10.5829017 |
| H | 17.2655408 | -27.4668316 | 12.1413075 |
| H | 19.8027419 | -27.4441589 | 11.6205669 |
| H | 19.3793847 | -27.9958580 | 9.9881994  |
| H | 21.2817147 | -21.0487439 | 8.3524513  |
| H | 21.4835304 | -19.8725302 | 7.0486494  |
| H | 18.9298214 | -19.5152684 | 7.0931534  |
| H | 18.8787681 | -20.4734824 | 8.5718699  |
| H | 18.4711925 | -16.4336647 | 10.2125954 |
| H | 20.2216496 | -16.3670522 | 9.8649142  |
| H | 19.9609126 | -13.9258485 | 10.1741075 |
| H | 18.1996337 | -14.1214564 | 10.3744115 |
| H | 18.0000010 | -9.6617873  | 9.2514893  |
| H | 19.7644174 | -9.7018152  | 8.9622968  |
| H | 18.6468471 | -10.4730682 | 7.7889485  |
| H | 20.3079721 | -11.5175001 | 11.1724838 |
| H | 18.8141200 | -10.5728062 | 11.3903319 |
| H | 18.7345237 | -12.3314552 | 11.5080639 |
| H | 20.3981249 | -18.5618346 | 9.4698399  |
| H | 16.4118887 | -23.1559439 | 5.2435290  |
| H | 16.6775035 | -23.0723315 | 6.9983237  |
| H | 17.5050387 | -20.7447305 | 6.7901596  |
| H | 17.2342356 | -20.7686147 | 5.0373879  |
| H | 13.4243063 | -19.2818332 | 6.3237194  |
| H | 13.1154109 | -19.8172186 | 8.0026782  |

|   |            |             |            |
|---|------------|-------------|------------|
| H | 14.5969459 | -17.2050399 | 6.0548516  |
| H | 15.8480755 | -17.3957647 | 7.3157950  |
| H | 15.9138526 | -12.8161938 | 7.6263200  |
| H | 14.7055820 | -12.8100406 | 6.3123363  |
| H | 14.1964725 | -13.2471293 | 7.9748744  |
| H | 16.0858606 | -14.8150024 | 5.0111977  |
| H | 17.2216872 | -14.3010710 | 6.3072594  |
| H | 16.7868817 | -15.9955988 | 6.1784657  |
| H | 14.9248045 | -20.5160409 | 5.4360643  |
| H | 20.5780912 | -25.1484340 | 9.8798259  |
| H | 19.9368761 | -26.3431311 | 8.7390189  |
| H | 18.1692743 | -24.8316072 | 8.0016744  |
| H | 18.5665295 | -23.6344733 | 9.2330301  |
| H | 20.8094927 | -23.2775315 | 8.2759627  |
| H | 20.5106015 | -24.4684524 | 7.0035705  |
| H | 18.3734085 | -34.8588301 | 13.3821085 |
| H | 19.7923416 | -33.7961701 | 13.3794592 |
| H | 17.3148095 | -33.4054204 | 15.1359380 |
| H | 18.7432707 | -32.3566872 | 15.1434373 |
| H | 18.4314680 | -31.9331577 | 12.6953014 |
| H | 16.9651202 | -32.9225968 | 12.6858197 |
| H | 17.4858942 | -23.8132036 | 13.5266982 |
| H | 17.0860783 | -22.6667534 | 12.2724395 |
| H | 16.3528848 | -25.6228378 | 11.9277629 |
| H | 16.5533370 | -24.4093908 | 10.6694528 |
| H | 19.0127746 | -24.2093678 | 11.3558011 |
| H | 18.7744409 | -25.5543547 | 12.4556748 |
| H | 20.0055258 | -21.0997471 | 5.5577760  |
| H | 21.3572914 | -22.1129296 | 6.0761607  |
| H | 18.8303143 | -22.7242372 | 4.8221891  |
| H | 18.5475298 | -24.2007539 | 5.7321706  |
| H | 13.1482496 | -31.4580761 | 15.4292157 |
| H | 14.1831926 | -30.9732038 | 16.7753662 |
| H | 14.3411851 | -29.5474960 | 14.0828314 |
| H | 15.5050282 | -29.4817920 | 15.4131601 |
| H | 15.7448967 | -32.0551463 | 15.1287529 |
| H | 14.8742697 | -31.8901813 | 13.5992900 |
| H | 17.7031012 | -34.0863960 | 17.1174596 |
| H | 17.8889766 | -35.6444284 | 17.9485924 |
| H | 20.4964006 | -35.0983081 | 17.8922785 |
| H | 19.9783945 | -33.4387098 | 17.5998794 |
| H | 19.2596996 | -34.0560289 | 22.1220206 |
| H | 18.8271065 | -35.7815050 | 21.7979635 |
| H | 20.0792897 | -35.9256817 | 24.4489336 |
| H | 20.4241803 | -34.1712231 | 24.1385467 |
| H | 24.5401871 | -34.5513357 | 26.0003762 |
| H | 23.9705134 | -35.9128041 | 27.0188249 |
| H | 24.3985542 | -36.2105784 | 25.3092859 |
| H | 21.6653144 | -35.4616887 | 27.5087825 |
| H | 22.0120147 | -33.7726977 | 27.0430129 |
| H | 20.6461290 | -34.6496642 | 26.3014912 |
| H | 18.5473862 | -33.9116625 | 19.7671065 |

|   |            |             |            |
|---|------------|-------------|------------|
| H | 22.6786751 | -36.5482172 | 14.7964467 |
| H | 22.1680488 | -35.4275872 | 16.0585537 |
| H | 20.9413052 | -37.2715355 | 17.2267015 |
| H | 21.0839863 | -38.3065453 | 15.7989800 |
| H | 25.0216660 | -39.0985981 | 17.7720239 |
| H | 25.1872744 | -37.4229707 | 18.4054038 |
| H | 25.4236554 | -40.4569307 | 20.8396897 |
| H | 24.8142163 | -40.7824941 | 19.1824502 |
| H | 20.9295808 | -42.3979813 | 20.7168894 |
| H | 21.7715772 | -42.9214583 | 22.2138773 |
| H | 21.2513349 | -41.2180809 | 22.0255339 |
| H | 23.6820366 | -43.7055442 | 21.2266825 |
| H | 23.4343232 | -43.3043191 | 19.5070426 |
| H | 24.8260681 | -42.6308750 | 20.4132722 |
| H | 23.5551819 | -38.2786929 | 16.2397360 |
| H | 19.1387095 | -36.6365422 | 16.2662004 |
| H | 17.7666581 | -35.8977250 | 15.4597065 |
| H | 20.2452393 | -36.7640440 | 14.0422736 |
| H | 21.1558468 | -35.2922990 | 13.6988882 |
| H | 12.7060303 | -27.3285721 | 14.6253866 |
| H | 11.1311660 | -27.6467327 | 13.8664883 |
| H | 9.9520254  | -27.1969723 | 15.9912564 |
| H | 11.4949913 | -26.8512739 | 16.8065300 |
| H | 9.7437342  | -23.3151164 | 13.2874837 |
| H | 9.0580664  | -23.0038518 | 14.9028746 |
| H | 10.4443782 | -21.1047046 | 15.5188166 |
| H | 11.0470858 | -21.0853925 | 13.8362069 |
| H | 14.0197903 | -18.8020214 | 16.8750450 |
| H | 14.7847391 | -20.2797112 | 16.2360356 |
| H | 14.7474842 | -18.7947371 | 15.2189636 |
| H | 11.6972305 | -18.2011651 | 15.9606264 |
| H | 12.5490679 | -18.0337850 | 14.3887588 |
| H | 11.1320297 | -19.1004791 | 14.5283223 |
| H | 11.5890672 | -24.7555797 | 15.7063593 |
| H | 12.7169891 | -29.6737380 | 19.6873114 |
| H | 14.1221522 | -29.7653360 | 18.6130572 |
| H | 13.5470157 | -27.4259484 | 17.7887423 |
| H | 12.2640549 | -27.3626943 | 19.0278902 |
| H | 15.4139296 | -26.9931807 | 22.6817812 |
| H | 15.8048455 | -26.0111299 | 21.2263023 |
| H | 14.1794736 | -25.7333531 | 24.3764743 |
| H | 12.8450474 | -26.2948971 | 23.3369525 |
| H | 10.2781111 | -23.1652073 | 25.5145700 |
| H | 11.7127291 | -22.7432280 | 26.4953121 |
| H | 11.6019873 | -22.1958333 | 24.7923394 |
| H | 12.7436774 | -25.2775254 | 26.7437089 |
| H | 11.0048297 | -25.4230395 | 26.3763967 |
| H | 12.1792642 | -26.3006043 | 25.3880970 |
| H | 14.9436992 | -26.6206571 | 19.3554885 |
| H | 10.7855572 | -29.5835645 | 15.4710146 |
| H | 12.0686252 | -29.7572807 | 14.2860301 |
| H | 11.2606301 | -29.1753346 | 17.6568670 |

|    |            |             |            |
|----|------------|-------------|------------|
| H  | 11.9087991 | -30.8133897 | 17.7258729 |
| H  | 15.4881229 | -22.0976584 | 10.7809153 |
| H  | 13.7721993 | -21.7319146 | 10.8471847 |
| H  | 14.1095752 | -20.3383457 | 12.9032052 |
| H  | 15.8066188 | -20.7807936 | 12.9476111 |
| H  | 16.2604010 | -17.5981809 | 9.9852000  |
| H  | 14.5799011 | -17.0520762 | 10.0645107 |
| H  | 14.4126449 | -15.5675614 | 12.4471443 |
| H  | 14.2539357 | -14.9054710 | 10.7895180 |
| H  | 14.7631592 | -10.7587506 | 12.6583638 |
| H  | 14.9487551 | -11.5652601 | 14.2433766 |
| H  | 16.2904370 | -11.6128466 | 13.0564575 |
| H  | 12.9899593 | -13.4001925 | 13.7613780 |
| H  | 12.7281245 | -12.1603239 | 12.5053397 |
| H  | 12.9085190 | -13.8574267 | 12.0348750 |
| H  | 15.4933475 | -19.7048243 | 10.3873912 |
| H  | 15.5648253 | -25.7235292 | 15.9048777 |
| H  | 16.9391522 | -25.2542617 | 14.9275888 |
| H  | 17.1859514 | -23.9864022 | 16.8903543 |
| H  | 16.4836262 | -22.8069001 | 15.7454206 |
| H  | 13.1807044 | -24.5956904 | 19.2910560 |
| H  | 14.3283832 | -23.7563983 | 20.3366729 |
| H  | 12.8818965 | -22.0734804 | 20.9042229 |
| H  | 11.5684953 | -22.8211190 | 19.9919450 |
| H  | 9.3453627  | -18.9330457 | 20.0811986 |
| H  | 10.7138787 | -18.0869422 | 20.8601242 |
| H  | 10.8084149 | -18.5308684 | 19.1236272 |
| H  | 10.7590770 | -19.9433417 | 22.5049716 |
| H  | 9.6054779  | -21.0299164 | 21.6903115 |
| H  | 11.2873607 | -21.5565697 | 21.9960948 |
| H  | 14.5105221 | -22.7505427 | 17.0062642 |
| H  | 13.4817402 | -22.9328686 | 12.9656509 |
| H  | 14.1336559 | -23.9702223 | 11.6906023 |
| H  | 14.0599436 | -24.2096414 | 14.6317006 |
| H  | 14.7955372 | -25.4792861 | 13.6354010 |
| N  | 24.5540421 | -38.9033927 | 23.5591360 |
| O  | 24.8538137 | -40.0455121 | 23.2312548 |
| O  | 24.2555049 | -38.0581116 | 22.5949898 |
| O  | 24.5461602 | -38.4967839 | 24.7069696 |
| Pu | 22.4510601 | -37.2263233 | 21.5138771 |

**[L<sub>II</sub>-Pu(NO<sub>3</sub>)<sub>4</sub>] (three monodentate and one bidentate nitrate)**

|   |            |             |            |
|---|------------|-------------|------------|
| C | 19.6959889 | -11.0109637 | 10.6358814 |
| N | 19.5839439 | -12.3703247 | 11.1328253 |
| C | 19.6788130 | -12.5601530 | 12.5719516 |
| C | 19.4561698 | -13.4006490 | 10.2345179 |
| C | 19.4644449 | -14.8065359 | 10.8367845 |
| O | 19.5332141 | -15.7584832 | 9.8077623  |
| C | 19.5211663 | -17.0642253 | 10.2974339 |
| C | 19.3629655 | -18.0485505 | 9.1394713  |
| O | 18.7112186 | -17.7808311 | 8.1405857  |



|   |            |             |            |
|---|------------|-------------|------------|
| O | 19.3416974 | -13.2129996 | 9.0310962  |
| N | 19.9492448 | -19.2667672 | 9.3345807  |
| C | 19.6862869 | -20.3719852 | 8.4259925  |
| C | 20.9080647 | -21.2077192 | 8.0412013  |
| C | 20.6251415 | -22.1202415 | 6.8322230  |
| N | 19.5331782 | -23.0776532 | 7.0247393  |
| C | 18.7223304 | -23.3687138 | 5.8357942  |
| C | 17.3029803 | -22.7690594 | 5.8633217  |
| C | 17.3308877 | -21.2401101 | 5.8180668  |
| N | 16.0474495 | -20.5551923 | 5.9151569  |
| C | 15.5668308 | -20.0515709 | 7.0806560  |
| C | 14.3351478 | -19.1341662 | 6.9460949  |
| O | 14.4544931 | -17.9477444 | 7.6690601  |
| C | 15.4937769 | -17.0917411 | 7.2404785  |
| C | 15.2764866 | -15.7009757 | 7.8613714  |
| N | 16.1998557 | -14.7518903 | 7.5429989  |
| C | 15.9860335 | -13.3791667 | 7.9751818  |
| C | 19.9423706 | -24.2657635 | 7.7701584  |
| C | 18.7966961 | -24.9746596 | 8.4948344  |
| C | 19.2628716 | -26.2116769 | 9.2721372  |
| N | 18.2019180 | -26.8164985 | 10.0665876 |
| C | 18.4240787 | -28.2150904 | 10.4216954 |
| C | 17.1234951 | -28.9484405 | 10.7637104 |
| C | 17.3133702 | -30.3255586 | 11.4071709 |
| C | 15.9618468 | -30.9879573 | 11.7298700 |
| N | 15.9896469 | -31.8779236 | 12.8857426 |
| C | 16.7097346 | -33.1270568 | 12.6499637 |
| C | 17.3095792 | -33.7238190 | 13.9291632 |
| C | 17.9207960 | -35.1081892 | 13.7077959 |
| N | 18.6001949 | -35.6807755 | 14.8670986 |
| C | 17.7388121 | -35.9232401 | 16.0256163 |
| C | 17.7012118 | -34.7840985 | 17.0664701 |
| C | 19.1030415 | -34.2634555 | 17.3887401 |
| N | 19.1213281 | -33.4430334 | 18.6066553 |
| C | 19.8800629 | -33.7087513 | 19.6593672 |
| C | 19.7490011 | -32.8172805 | 20.8864307 |
| O | 20.5910826 | -33.3738617 | 21.8709099 |
| C | 20.3976674 | -32.9004720 | 23.1810363 |
| C | 21.3806036 | -33.6726478 | 24.0591982 |
| N | 21.5093241 | -33.3677479 | 25.3566133 |
| C | 22.4135457 | -34.1579478 | 26.1975956 |
| C | 17.7734923 | -25.9846252 | 11.1958856 |
| C | 16.3119584 | -25.5212355 | 11.1478419 |
| C | 16.0346612 | -24.4625463 | 12.2290059 |
| N | 14.6424581 | -24.1153303 | 12.4916713 |
| C | 13.8807931 | -23.6749201 | 11.3296273 |
| C | 14.4172993 | -22.4009993 | 10.6682676 |
| C | 14.4385172 | -21.2061269 | 11.6162418 |
| N | 14.9925517 | -20.0227512 | 10.9800848 |
| C | 15.0012340 | -18.8254426 | 11.6111031 |
| C | 15.5961556 | -17.6808948 | 10.7833499 |
| O | 16.0812829 | -16.6183128 | 11.5699227 |

|   |            |             |            |
|---|------------|-------------|------------|
| C | 15.0775864 | -15.7294527 | 11.9854969 |
| C | 15.7003153 | -14.5623698 | 12.7491621 |
| N | 14.8163646 | -13.6418441 | 13.2606714 |
| C | 15.3146739 | -12.5520528 | 14.0797959 |
| C | 13.8998800 | -25.0359788 | 13.3471016 |
| C | 14.5050834 | -25.2562735 | 14.7437030 |
| C | 14.9736440 | -23.9516070 | 15.4131111 |
| N | 14.7859889 | -23.8739967 | 16.8539298 |
| C | 15.3579995 | -24.6867511 | 17.7450130 |
| C | 15.1320024 | -24.3305681 | 19.2082077 |
| O | 14.5484712 | -23.0631251 | 19.3408846 |
| C | 14.3841957 | -22.6717756 | 20.6733702 |
| C | 13.8782062 | -21.2270274 | 20.7163296 |
| N | 13.6995451 | -20.6881110 | 21.9699660 |
| C | 13.2219061 | -19.3229891 | 22.0854925 |
| O | 16.0306869 | -25.6898208 | 17.4543148 |
| O | 16.0748930 | -20.2878230 | 8.1728238  |
| O | 14.3077486 | -15.4876108 | 8.5828423  |
| C | 17.4199044 | -14.9877948 | 6.7801959  |
| C | 14.6706498 | -32.0882350 | 13.4763032 |
| C | 14.0553652 | -30.8342252 | 14.1156000 |
| C | 13.0090156 | -31.1841137 | 15.1791282 |
| N | 12.2904097 | -30.0253255 | 15.7084407 |
| C | 11.1646120 | -29.6084807 | 14.8635577 |
| C | 11.0758434 | -28.1070364 | 14.5500876 |
| C | 10.5666431 | -27.2071428 | 15.6862390 |
| N | 10.4528804 | -25.8084193 | 15.3001090 |
| C | 9.4429979  | -25.3542500 | 14.5178912 |
| C | 9.4810887  | -23.8499813 | 14.2299253 |
| O | 10.6425697 | -23.2779615 | 14.7727701 |
| C | 10.7423890 | -21.8847085 | 14.7055547 |
| C | 11.9083487 | -21.4476848 | 15.6155333 |
| N | 12.2340800 | -20.1287494 | 15.6222486 |
| C | 13.3598839 | -19.6850059 | 16.4400898 |
| C | 11.9939558 | -30.1528091 | 17.1365400 |
| C | 13.2004204 | -29.8497128 | 18.0372807 |
| C | 13.5311207 | -28.3540721 | 18.0552380 |
| N | 14.7990997 | -27.9885833 | 18.6744804 |
| C | 15.0754394 | -28.2094248 | 19.9790329 |
| C | 16.3558986 | -27.5288577 | 20.4907393 |
| O | 16.0511163 | -26.5299321 | 21.4464531 |
| C | 15.6929756 | -27.0066462 | 22.7143239 |
| C | 15.2059823 | -25.8354501 | 23.5746234 |
| N | 14.8545067 | -26.1460250 | 24.8674201 |
| C | 14.4556853 | -25.0837129 | 25.7742809 |
| O | 14.3648573 | -28.8657157 | 20.7402209 |
| C | 19.4578989 | -36.8125587 | 14.4927631 |
| C | 20.8416218 | -36.3883163 | 13.9802512 |
| C | 21.7335216 | -35.8588797 | 15.1052220 |
| N | 22.9898787 | -35.3054044 | 14.6270480 |
| C | 23.4898598 | -34.1114885 | 15.0595111 |
| C | 24.8123175 | -33.7118136 | 14.3716022 |

|   |            |             |            |
|---|------------|-------------|------------|
| O | 25.4460561 | -32.6151862 | 14.9399882 |
| C | 26.0760352 | -32.8691667 | 16.1664449 |
| C | 26.8882921 | -31.6259944 | 16.5607009 |
| N | 27.6750900 | -31.7423560 | 17.6869850 |
| C | 28.4752604 | -30.6043926 | 18.0974116 |
| O | 22.9357691 | -33.3958330 | 15.8769209 |
| O | 19.9255697 | -36.2907595 | 22.4897231 |
| N | 18.6154234 | -36.1056262 | 22.4827870 |
| O | 17.9249187 | -36.9837129 | 22.9374342 |
| O | 23.3389444 | -33.8014158 | 21.1160800 |
| N | 24.0168790 | -34.3270545 | 20.1639893 |
| O | 23.6470391 | -35.5132299 | 19.8592354 |
| O | 20.6946869 | -34.6549175 | 19.6797767 |
| O | 22.0343579 | -34.5908069 | 23.5382627 |
| O | 26.8280451 | -30.6023478 | 15.9064003 |
| O | 24.9169928 | -33.7583724 | 19.6147767 |
| C | 20.7244604 | -32.3490943 | 26.0390563 |
| C | 27.8145488 | -32.9331431 | 18.5018144 |
| O | 8.5463938  | -26.0490080 | 14.0642601 |
| O | 12.4809582 | -22.2873934 | 16.2995794 |
| C | 11.7009331 | -19.1352710 | 14.7010888 |
| O | 15.1369999 | -24.7001025 | 23.1301219 |
| C | 14.9128547 | -27.4753325 | 25.4459154 |
| O | 14.5349059 | -18.6528403 | 12.7363240 |
| O | 16.9105770 | -14.4526871 | 12.8960326 |
| C | 13.3722405 | -13.7434846 | 13.1529272 |
| O | 13.6489237 | -20.6007287 | 19.6954373 |
| C | 13.9748592 | -21.3683518 | 23.2216891 |
| O | 18.1977480 | -35.0397122 | 22.0231810 |
| O | 21.3759918 | -37.3342625 | 20.0216952 |
| N | 21.1982645 | -37.5325700 | 18.7147613 |
| O | 22.1668571 | -37.8593920 | 18.0637723 |
| O | 20.0629959 | -37.3881986 | 18.2870838 |
| H | 15.2470484 | -30.1842757 | 11.9585243 |
| H | 15.5581470 | -31.4973141 | 10.8223999 |
| H | 17.8668020 | -30.2108849 | 12.3553403 |
| H | 17.9310489 | -30.9707780 | 10.7571564 |
| H | 16.5071467 | -29.0225544 | 9.8495263  |
| H | 16.5406950 | -28.3322993 | 11.4677498 |
| H | 19.1329331 | -28.3145562 | 11.2785698 |
| H | 18.9077186 | -28.7164010 | 9.5664923  |
| H | 21.2594740 | -21.8061300 | 8.9017405  |
| H | 21.7421363 | -20.5371576 | 7.7706594  |
| H | 19.2754588 | -19.8911460 | 7.5299549  |
| H | 18.8907165 | -21.0232322 | 8.8242847  |
| H | 18.6650634 | -17.2267668 | 10.9867849 |
| H | 20.4452570 | -17.2949019 | 10.8735251 |
| H | 20.3351337 | -14.9045085 | 11.5203311 |
| H | 18.5522521 | -14.9452741 | 11.4510609 |
| H | 18.8665424 | -10.3817747 | 11.0068976 |
| H | 20.6464637 | -10.5499550 | 10.9611237 |
| H | 19.6641866 | -11.0360847 | 9.5401282  |

|   |            |             |            |
|---|------------|-------------|------------|
| H | 20.7214665 | -12.7122032 | 12.9125497 |
| H | 19.2949091 | -11.6576971 | 13.0731890 |
| H | 19.0541462 | -13.3976460 | 12.9078394 |
| H | 20.4313788 | -19.4432318 | 10.2091026 |
| H | 16.7294197 | -23.1663553 | 5.0056199  |
| H | 16.7889179 | -23.0952681 | 6.7818942  |
| H | 17.9316441 | -20.8822658 | 6.6589863  |
| H | 17.8197960 | -20.9006739 | 4.8884049  |
| H | 14.1247546 | -18.9345894 | 5.8726649  |
| H | 13.4667008 | -19.6704971 | 7.3639437  |
| H | 15.4841501 | -16.9904589 | 6.1345666  |
| H | 16.4825509 | -17.4902027 | 7.5302508  |
| H | 16.8489031 | -13.0287338 | 8.5625006  |
| H | 15.8775881 | -12.7137318 | 7.0984168  |
| H | 15.0699916 | -13.3325839 | 8.5749828  |
| H | 17.3149131 | -14.6462913 | 5.7320516  |
| H | 18.2431053 | -14.4351959 | 7.2583247  |
| H | 17.7109947 | -16.0427258 | 6.8001481  |
| H | 15.5809780 | -20.2852494 | 5.0573935  |
| H | 20.1467555 | -25.9371037 | 9.8982863  |
| H | 19.6254345 | -26.9654784 | 8.5530945  |
| H | 18.0122567 | -25.2877254 | 7.7854015  |
| H | 18.3239952 | -24.2464090 | 9.1746604  |
| H | 20.6835092 | -23.9549150 | 8.5242623  |
| H | 20.4742433 | -24.9902958 | 7.1080632  |
| H | 17.1226901 | -35.7990795 | 13.3417859 |
| H | 18.6554072 | -35.0363010 | 12.8881494 |
| H | 16.5226601 | -33.7902647 | 14.6962694 |
| H | 18.0756572 | -33.0337808 | 14.3205162 |
| H | 17.5298896 | -32.9262355 | 11.9428296 |
| H | 16.0576991 | -33.8827758 | 12.1505766 |
| H | 16.4780505 | -24.8039002 | 13.1774474 |
| H | 16.5877665 | -23.5409257 | 11.9683042 |
| H | 15.6411104 | -26.3867119 | 11.2779172 |
| H | 16.1010364 | -25.1205248 | 10.1430275 |
| H | 18.4199040 | -25.0888303 | 11.2544836 |
| H | 17.9504637 | -26.5212984 | 12.1492968 |
| H | 20.3643813 | -21.4723143 | 5.9806400  |
| H | 21.5692605 | -22.6345626 | 6.5422933  |
| H | 19.2437453 | -23.0188283 | 4.9221781  |
| H | 18.6303492 | -24.4614494 | 5.7141532  |
| H | 12.2995352 | -31.9423941 | 14.7746594 |
| H | 13.5271453 | -31.6847720 | 16.0129006 |
| H | 13.5937232 | -30.1887793 | 13.3499427 |
| H | 14.8576555 | -30.2418580 | 14.5861907 |
| H | 14.7783348 | -32.8522765 | 14.2634862 |
| H | 13.9537832 | -32.5227306 | 12.7381342 |
| H | 17.0587133 | -33.9518450 | 16.7329339 |
| H | 17.2453030 | -35.1889684 | 17.9862283 |
| H | 19.7856622 | -35.1016959 | 17.5682817 |
| H | 19.5092644 | -33.6710063 | 16.5560723 |
| H | 20.0658587 | -31.7855946 | 20.6392049 |

|   |            |             |            |
|---|------------|-------------|------------|
| H | 18.6986938 | -32.8137399 | 21.2216295 |
| H | 19.3596590 | -33.0951646 | 23.5116305 |
| H | 20.5926527 | -31.8131868 | 23.2357163 |
| H | 23.1293979 | -33.4867078 | 26.6984158 |
| H | 21.8329315 | -34.6933696 | 26.9668941 |
| H | 22.9561280 | -34.8820883 | 25.5779985 |
| H | 19.9739846 | -32.8137653 | 26.7019773 |
| H | 21.3887934 | -31.7255292 | 26.6580219 |
| H | 20.2050887 | -31.6911937 | 25.3325544 |
| H | 18.4829995 | -32.6539660 | 18.6615300 |
| H | 21.3182348 | -37.2642484 | 13.5021013 |
| H | 20.7434271 | -35.6202175 | 13.1935126 |
| H | 21.2254419 | -35.0430348 | 15.6328630 |
| H | 21.9182501 | -36.6574113 | 15.8461696 |
| H | 25.4810494 | -34.6007715 | 14.3247526 |
| H | 24.5696237 | -33.4350028 | 13.3303808 |
| H | 26.7542330 | -33.7443798 | 16.0780805 |
| H | 25.3413869 | -33.1018340 | 16.9602672 |
| H | 28.2135308 | -30.2900668 | 19.1244037 |
| H | 29.5531439 | -30.8521549 | 18.0827558 |
| H | 28.2859847 | -29.7762658 | 17.4041285 |
| H | 28.8417954 | -33.3420146 | 18.4408363 |
| H | 27.6080670 | -32.7005559 | 19.5614178 |
| H | 27.1091329 | -33.7167842 | 18.2097287 |
| H | 23.5686730 | -35.8803708 | 14.0245398 |
| H | 18.1169558 | -36.8137302 | 16.5485701 |
| H | 16.6973567 | -36.1624429 | 15.7196696 |
| H | 19.6048310 | -37.4429693 | 15.3830391 |
| H | 18.9639281 | -37.4553014 | 13.7312634 |
| H | 12.0670809 | -27.7559713 | 14.2170322 |
| H | 10.3788965 | -27.9783010 | 13.7049489 |
| H | 9.5723047  | -27.5638266 | 16.0066486 |
| H | 11.2341926 | -27.2505700 | 16.5586621 |
| H | 9.4174507  | -23.7186162 | 13.1311323 |
| H | 8.5625758  | -23.4037786 | 14.6629796 |
| H | 9.8058978  | -21.3994094 | 15.0514539 |
| H | 10.9140576 | -21.5516883 | 13.6626417 |
| H | 13.1381093 | -18.6833005 | 16.8405926 |
| H | 13.5119206 | -20.3689472 | 17.2834746 |
| H | 14.2794368 | -19.6165985 | 15.8322092 |
| H | 11.4432304 | -18.2178668 | 15.2574573 |
| H | 12.4504004 | -18.8769967 | 13.9319294 |
| H | 10.7854834 | -19.4852718 | 14.2091012 |
| H | 11.1190228 | -25.1168119 | 15.6350003 |
| H | 12.9962161 | -30.1888050 | 19.0638153 |
| H | 14.0823556 | -30.4134359 | 17.6871987 |
| H | 13.5715016 | -27.9901726 | 17.0180905 |
| H | 12.7062293 | -27.8192947 | 18.5649130 |
| H | 17.0171873 | -28.3062368 | 20.9248085 |
| H | 16.8874560 | -27.0211378 | 19.6729311 |
| H | 16.5651665 | -27.4862040 | 23.2111650 |
| H | 14.9025784 | -27.7743043 | 22.6367850 |

|    |            |             |            |
|----|------------|-------------|------------|
| H  | 13.4241232 | -25.2415315 | 26.1367823 |
| H  | 15.1252078 | -25.0470480 | 26.6527225 |
| H  | 14.5069000 | -24.1259423 | 25.2446172 |
| H  | 15.7879163 | -27.5984423 | 26.1130892 |
| H  | 14.0073927 | -27.6580833 | 26.0492688 |
| H  | 14.9506022 | -28.2534782 | 24.6751177 |
| H  | 15.3704598 | -27.2933276 | 18.1766098 |
| H  | 10.1978369 | -29.9598152 | 15.2858981 |
| H  | 11.2598389 | -30.1281209 | 13.8966061 |
| H  | 11.1802675 | -29.4541119 | 17.3894314 |
| H  | 11.5998403 | -31.1654421 | 17.3793266 |
| H  | 15.4285599 | -22.5678629 | 10.2582256 |
| H  | 13.7787167 | -22.1731477 | 9.7965168  |
| H  | 13.4141965 | -20.9876284 | 11.9706333 |
| H  | 15.0159832 | -21.4570873 | 12.5225748 |
| H  | 16.4397522 | -18.0569694 | 10.1843471 |
| H  | 14.8270224 | -17.3379958 | 10.0675083 |
| H  | 14.3525128 | -16.2447798 | 12.6402500 |
| H  | 14.5275007 | -15.3399932 | 11.1043196 |
| H  | 15.0071884 | -11.5762283 | 13.6632097 |
| H  | 14.9234973 | -12.6214107 | 15.1115700 |
| H  | 16.4088196 | -12.6043311 | 14.1100541 |
| H  | 12.9145950 | -14.1599075 | 14.0710423 |
| H  | 12.9448280 | -12.7395368 | 12.9918815 |
| H  | 13.0713020 | -14.3649914 | 12.3018177 |
| H  | 15.3844004 | -20.0946834 | 10.0366349 |
| H  | 13.7182830 | -25.7176846 | 15.3626077 |
| H  | 15.3293584 | -25.9864925 | 14.7261005 |
| H  | 16.0387060 | -23.7773528 | 15.1827353 |
| H  | 14.4145826 | -23.1076240 | 14.9946769 |
| H  | 14.5106517 | -25.1227350 | 19.6728105 |
| H  | 16.1120904 | -24.3888477 | 19.7193712 |
| H  | 15.3377039 | -22.7599211 | 21.2293294 |
| H  | 13.6754451 | -23.3396094 | 21.2036683 |
| H  | 12.2817813 | -19.2838922 | 22.6653564 |
| H  | 13.9653687 | -18.6865447 | 22.5999402 |
| H  | 13.0443429 | -18.9282470 | 21.0783047 |
| H  | 14.7485167 | -20.8253342 | 23.7968268 |
| H  | 13.0649188 | -21.4060824 | 23.8496388 |
| H  | 14.3254705 | -22.3966512 | 23.0740370 |
| H  | 14.1846485 | -23.1229982 | 17.1974201 |
| H  | 12.8505454 | -23.4801910 | 11.6737782 |
| H  | 13.7901569 | -24.4689236 | 10.5534718 |
| H  | 12.8978775 | -24.5958067 | 13.4832981 |
| H  | 13.7337045 | -26.0306239 | 12.8698583 |
| N  | 24.1008263 | -37.3343510 | 23.4116656 |
| O  | 24.7308597 | -38.3423023 | 23.2166278 |
| O  | 23.0728979 | -37.1072249 | 22.5631546 |
| O  | 24.2909079 | -36.5112036 | 24.2866679 |
| Pu | 21.8411760 | -35.7123901 | 21.4455082 |
